# Supplementary material
Source: publisher figshare collection journal article supplement (https://diabetesjournals.figshare.com/articles/dataset/_/25259617)

Supplementary Fig.1

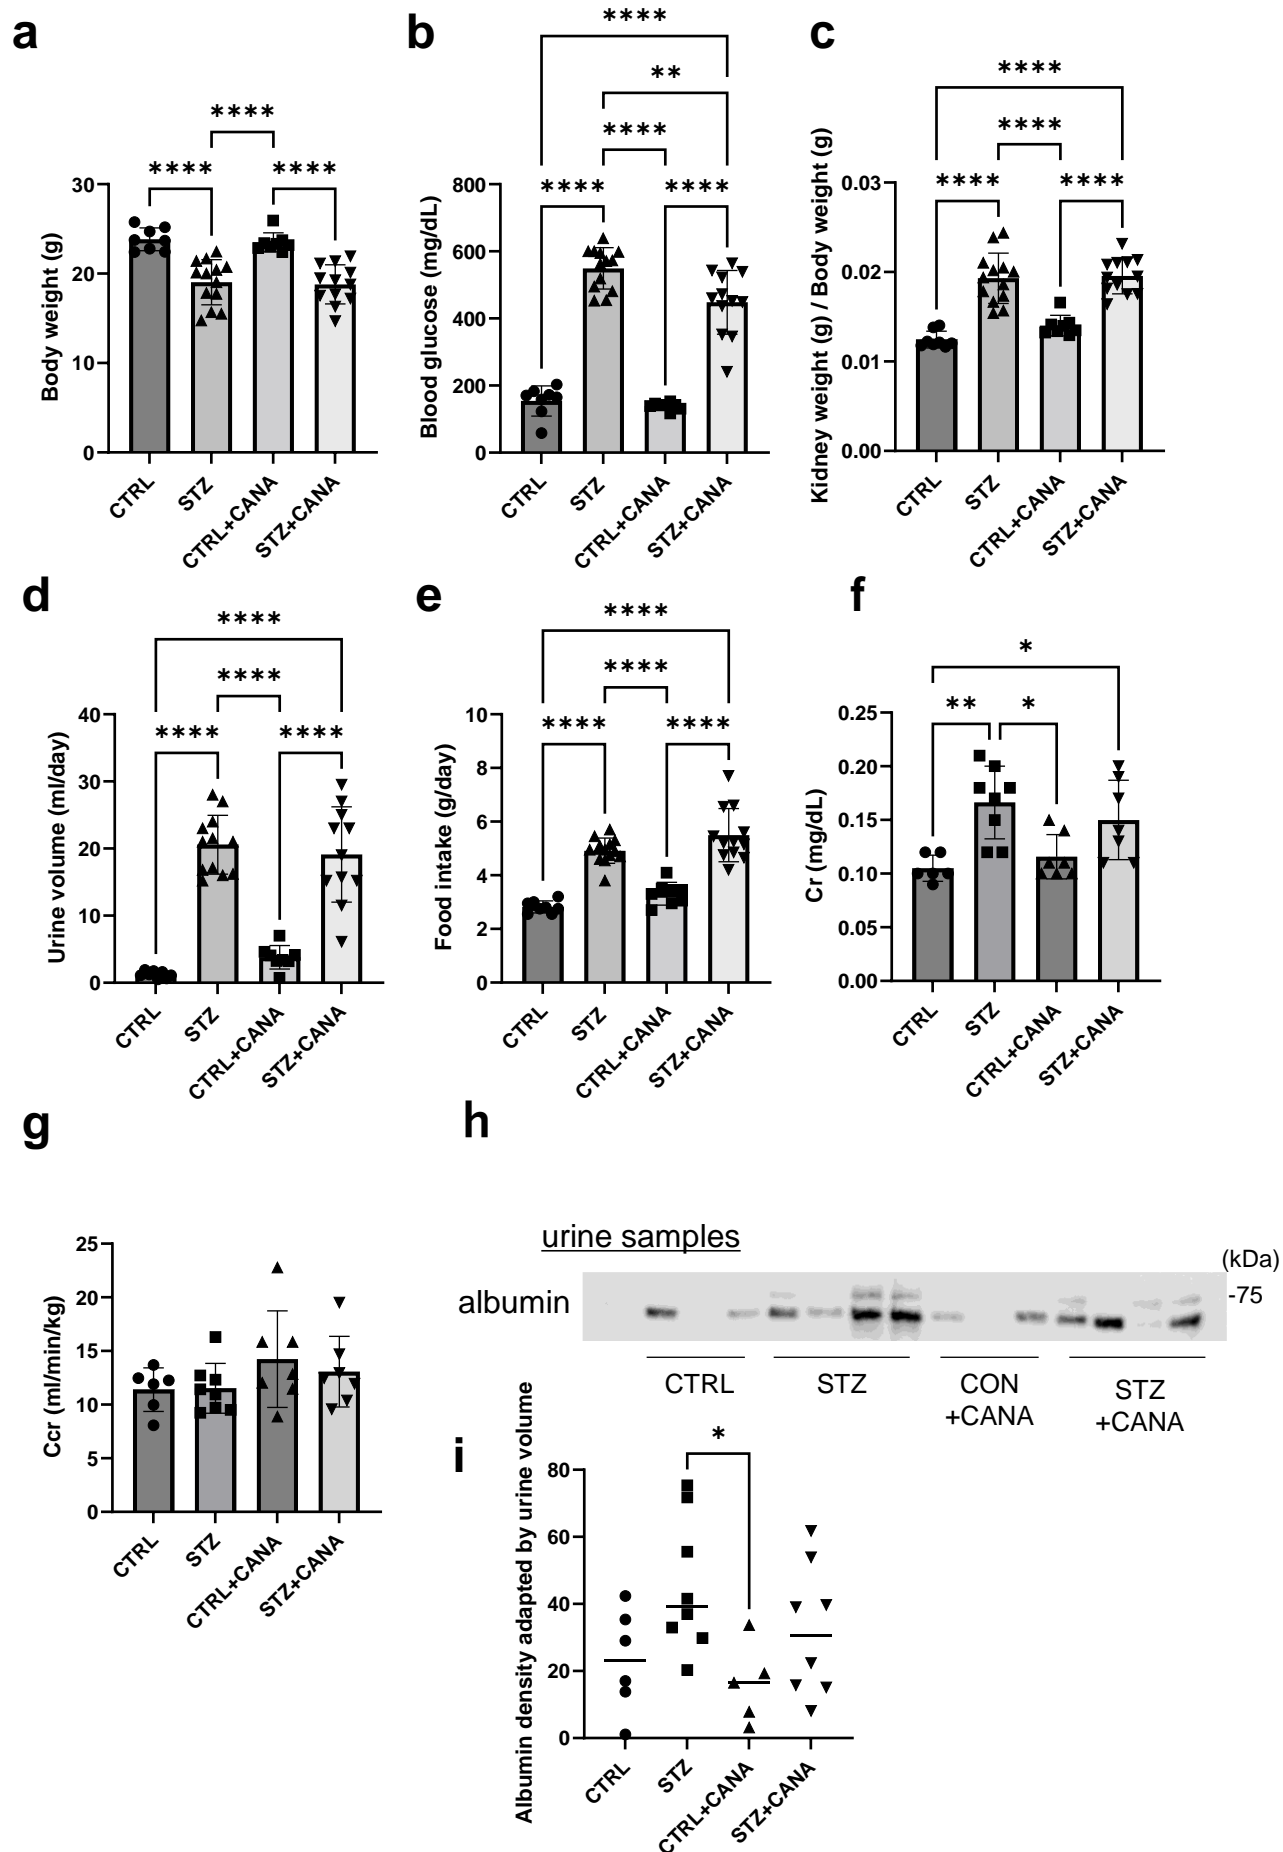

Supplementary Fig.2

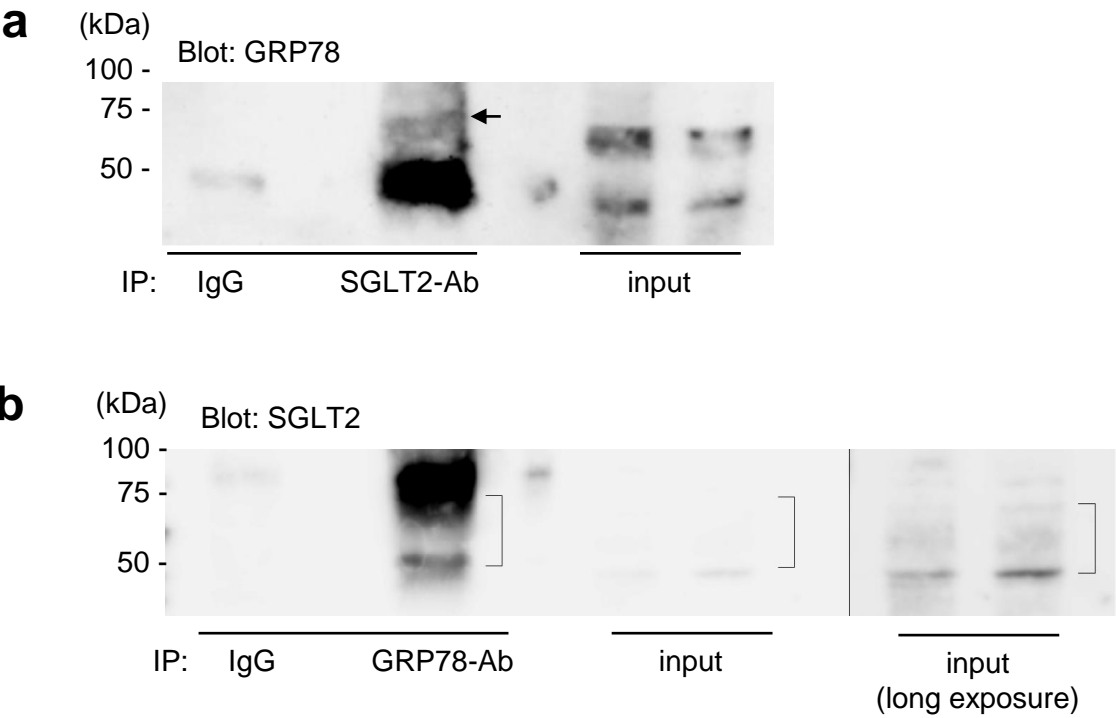

Supplementary Fig.3

**a**

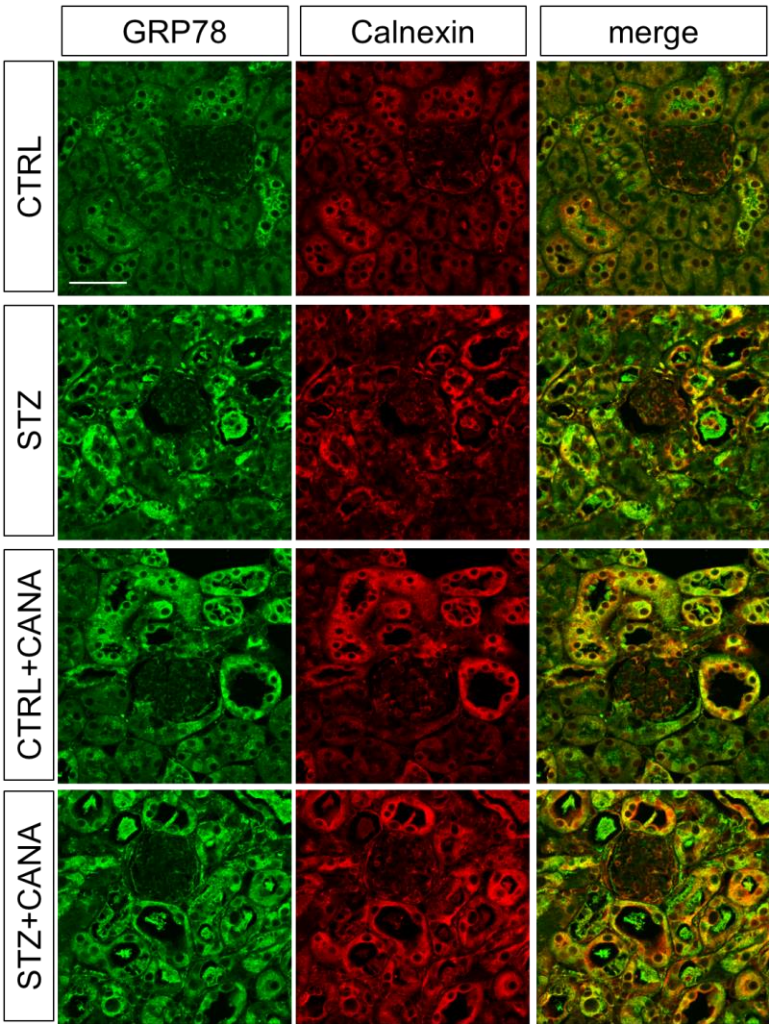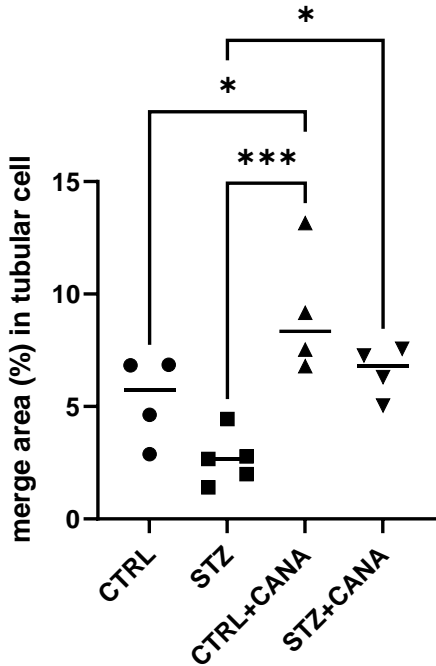

**b**

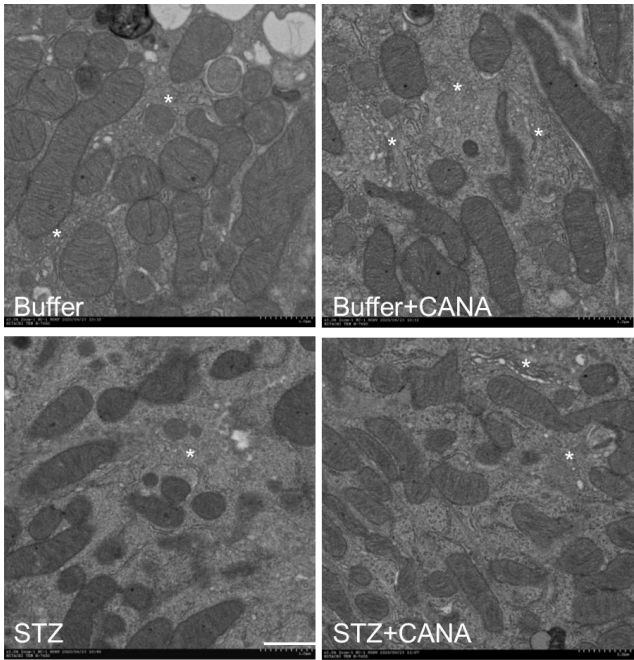

Supplementary Fig.4

**a**

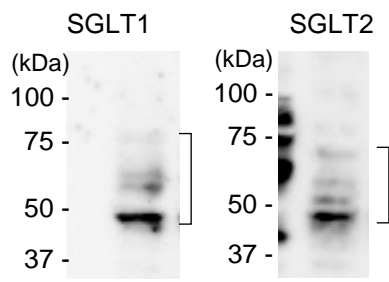

**b**

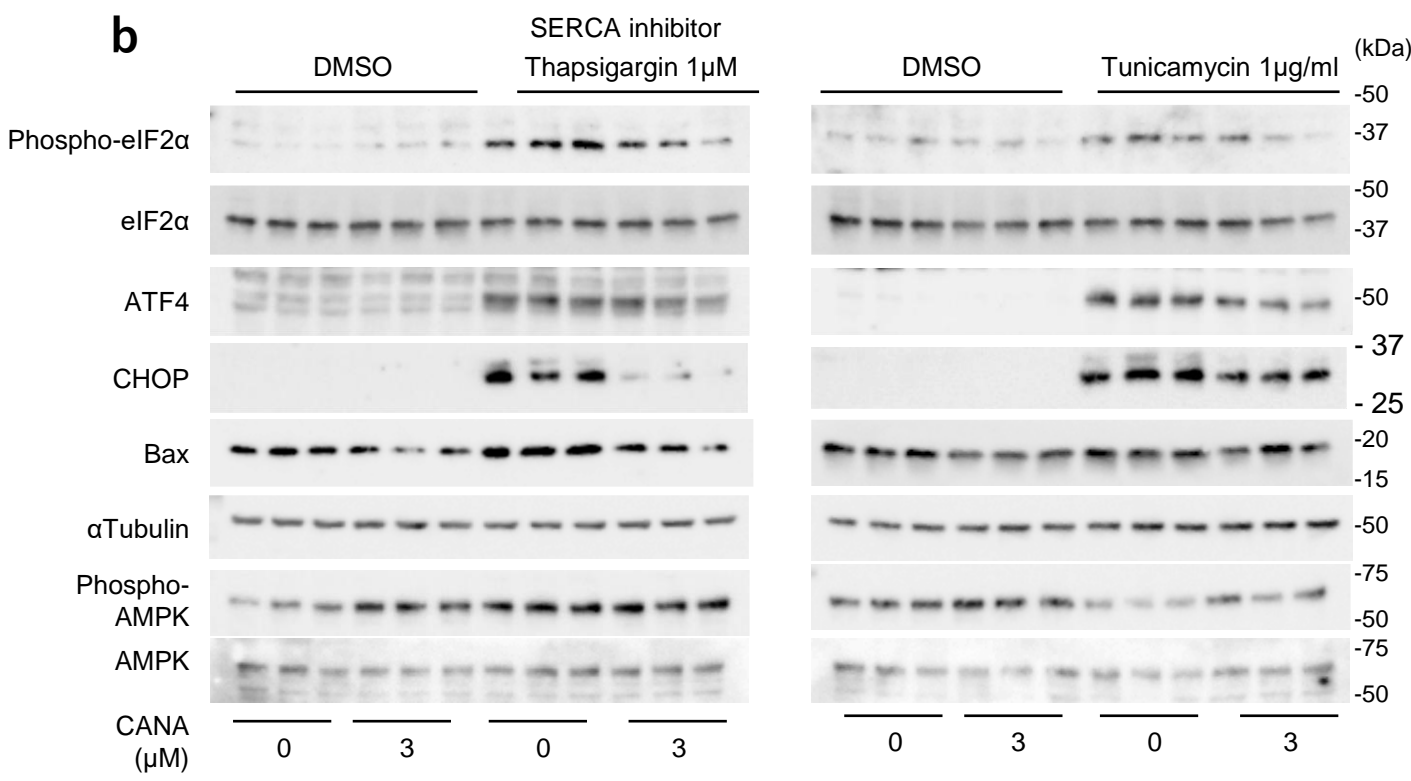

**c**

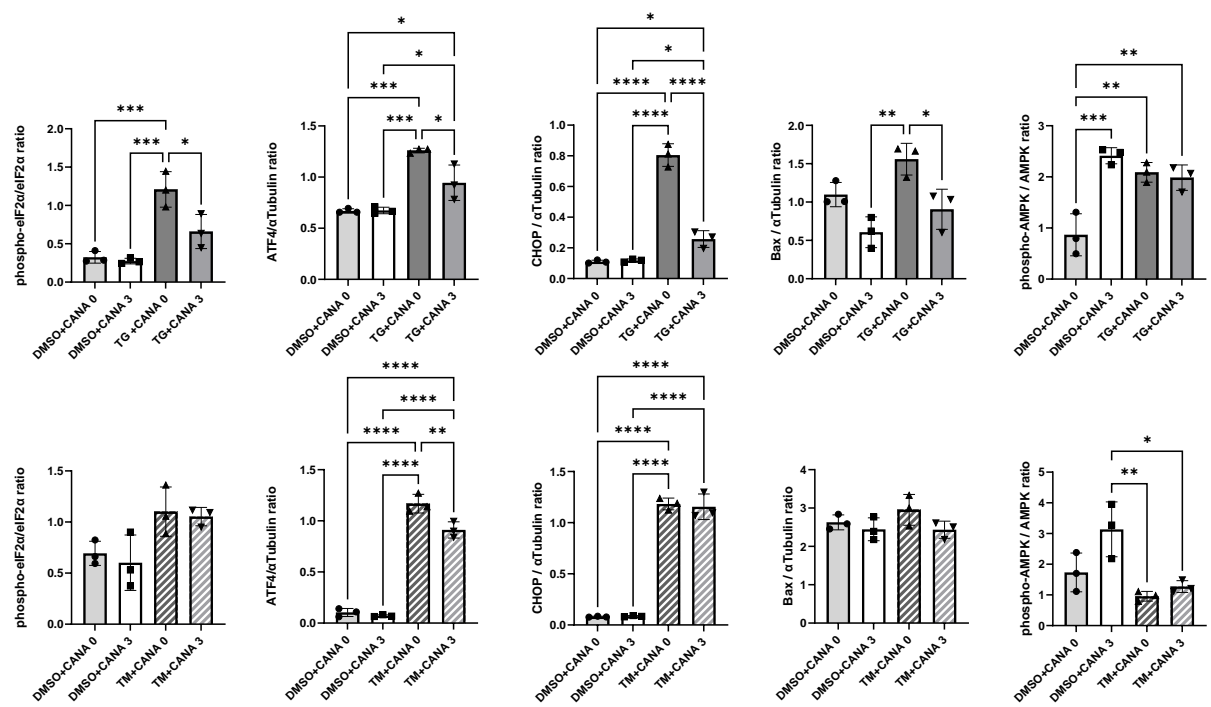

Supplementary Fig.5

**a** TUNEL Assay

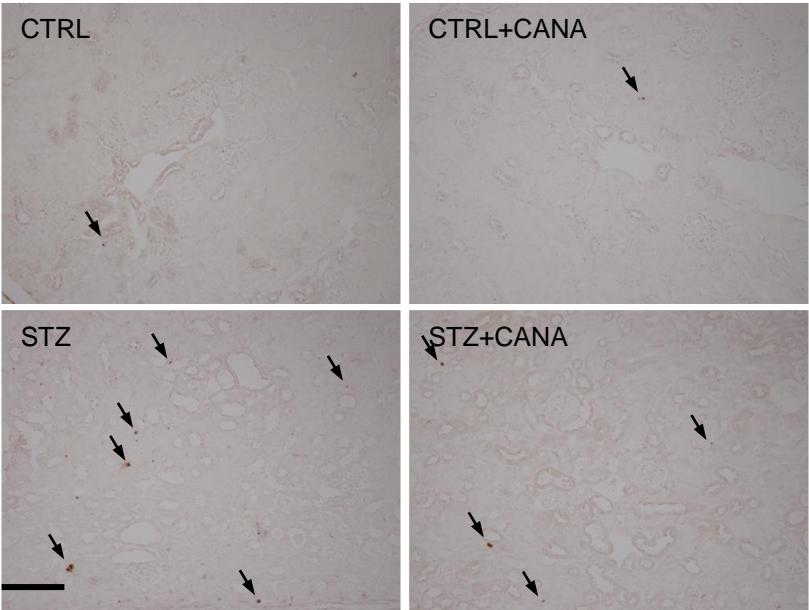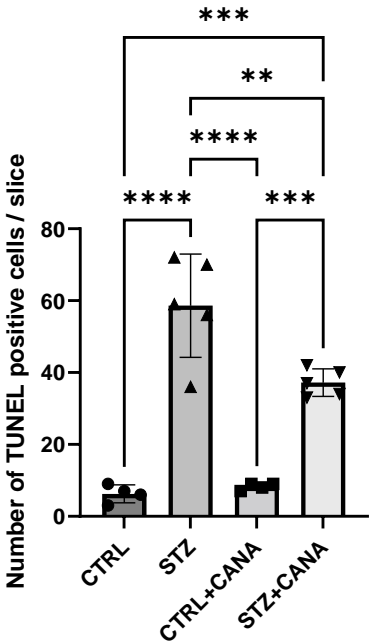

**b** KIM-1

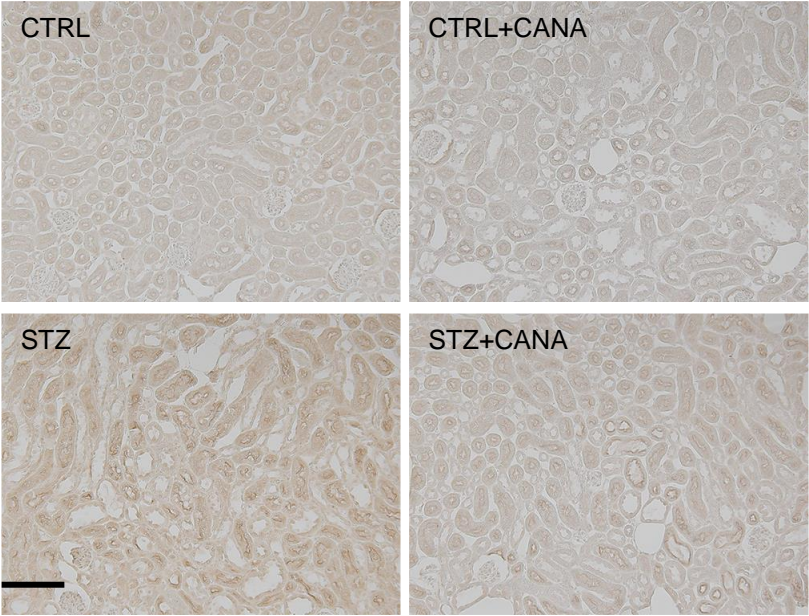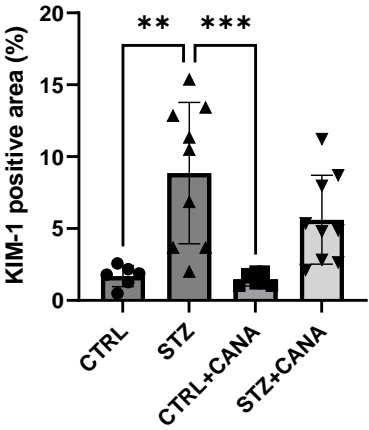

**c**

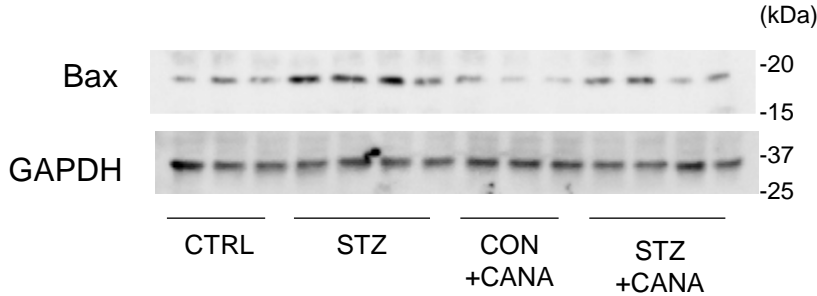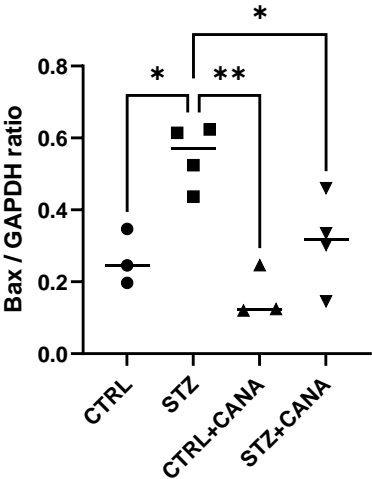



Supplementary Fig.6

Fibronectin

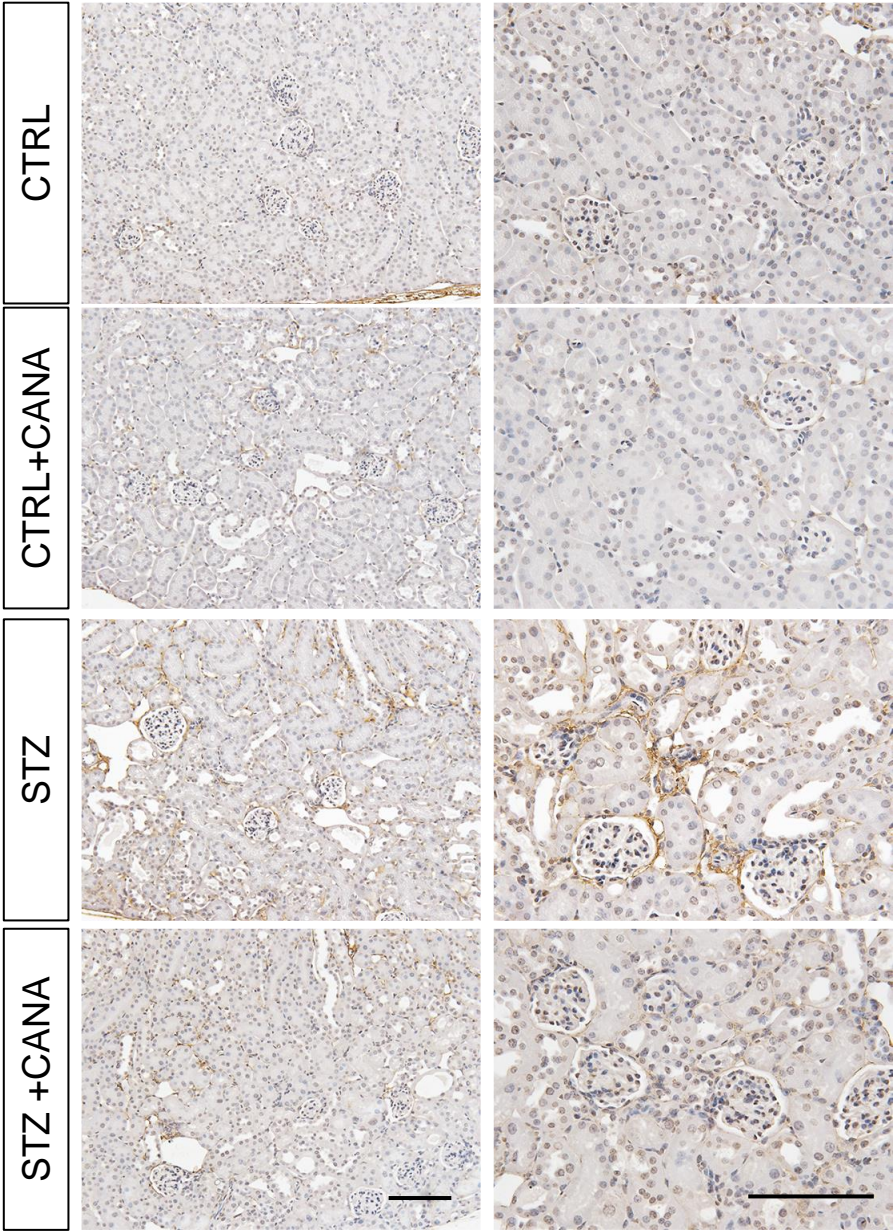

Bar= 100μm

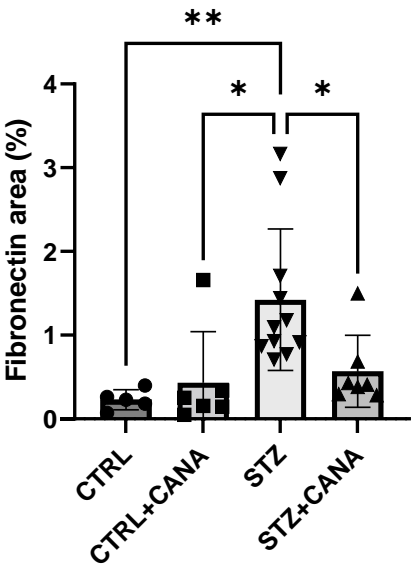

Supplementary Fig.7

**a**

urine samples

(kDa) Blot: GRP78

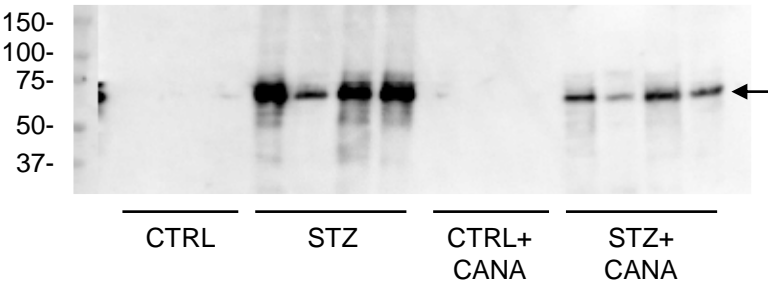

**b**

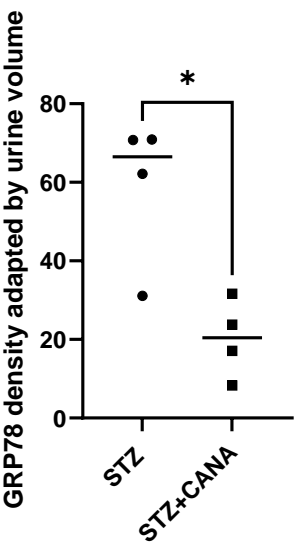

Supplementary Fig.8

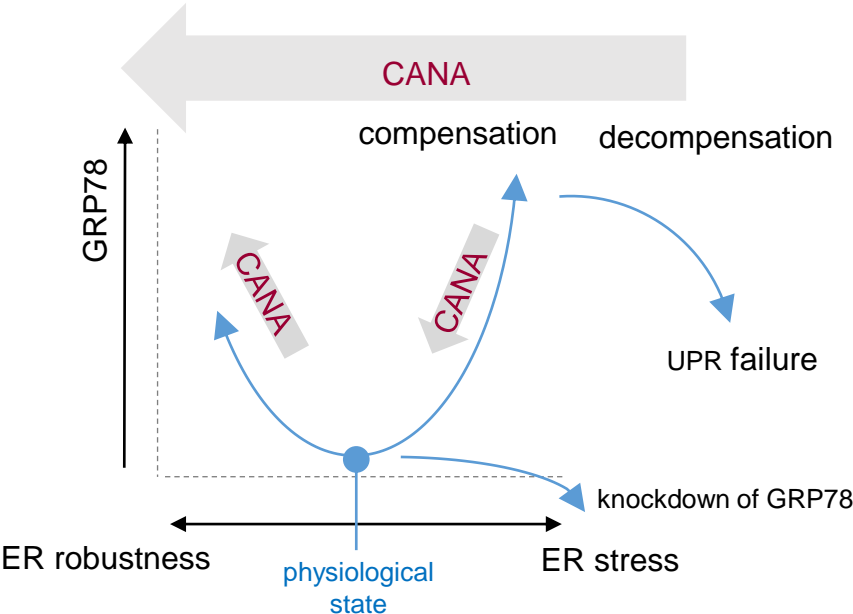



Supplementary Fig.9

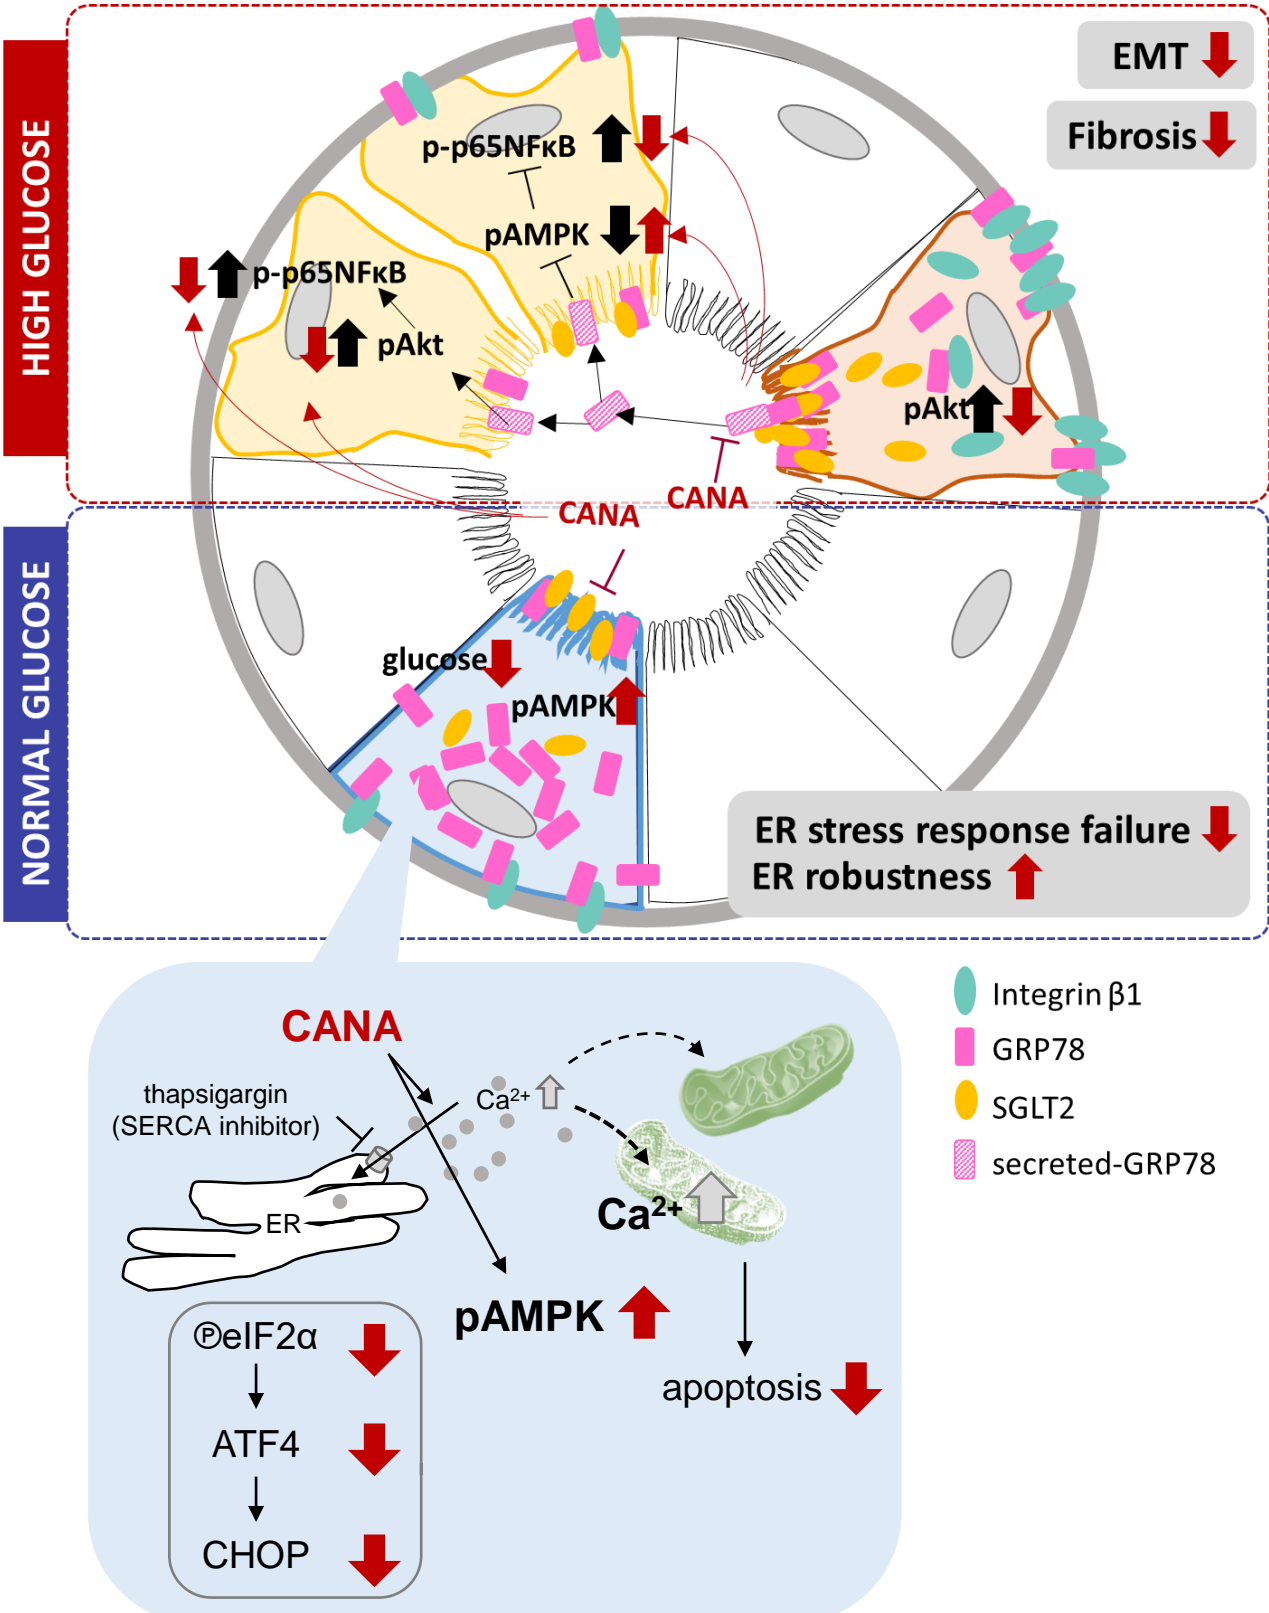

reproducibility experiment of Figure 2b and Figure 8f  
using another mouse kidney.

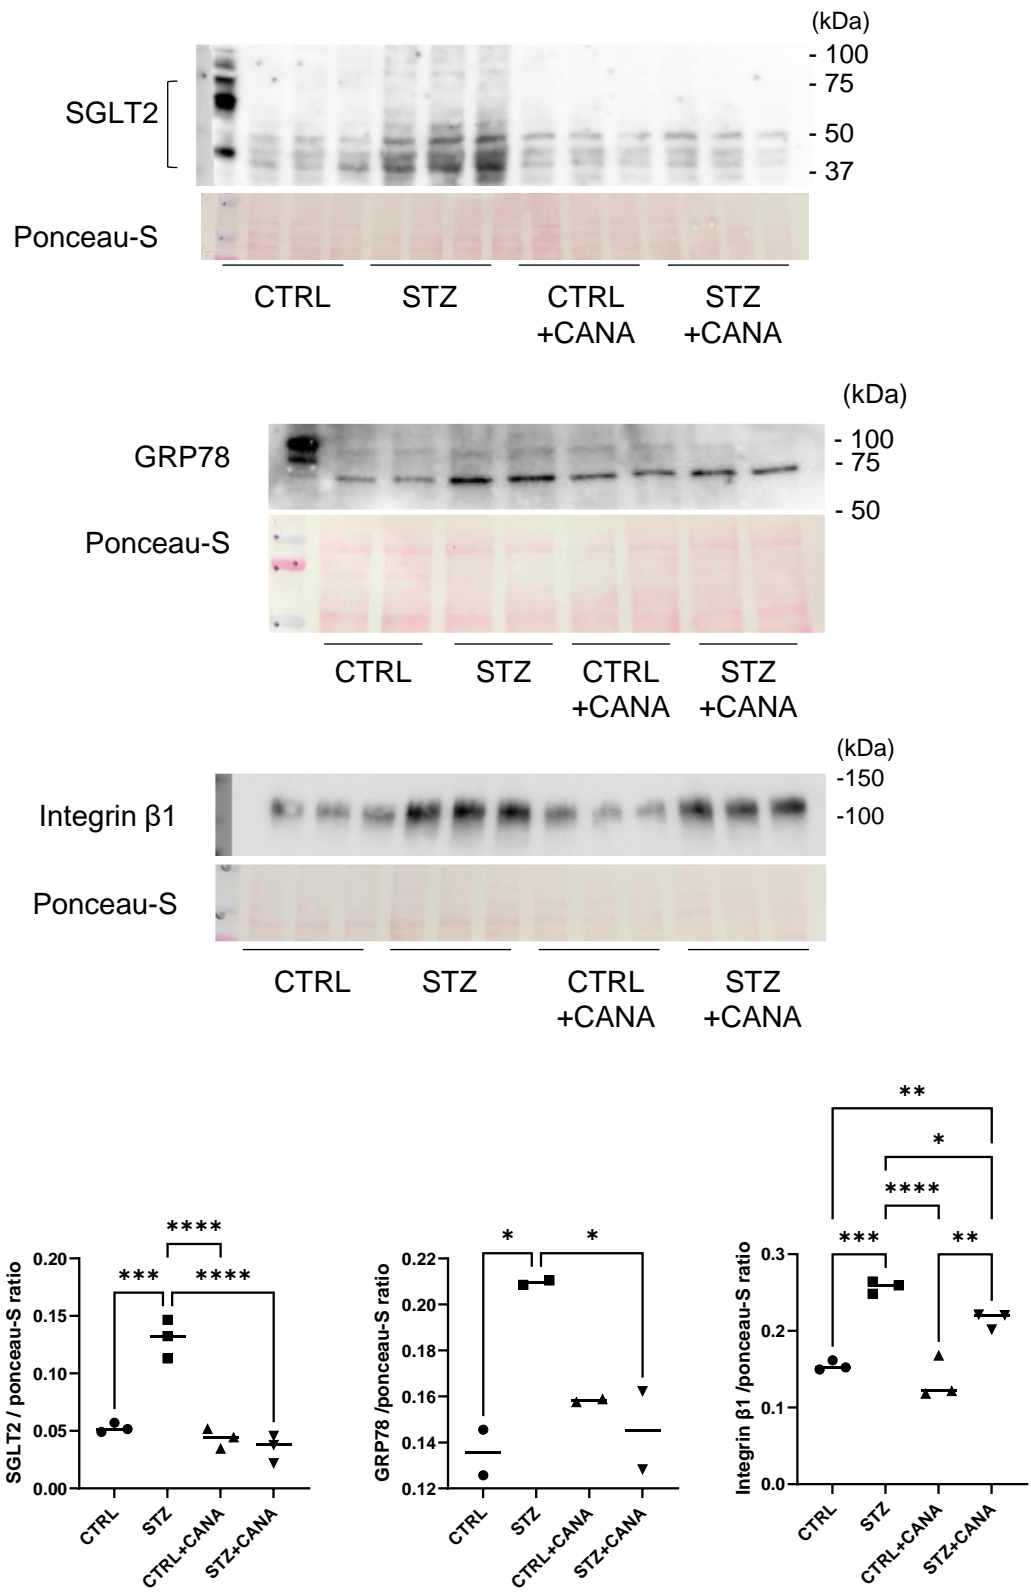

**a**                      Uncropped images in Figure 2

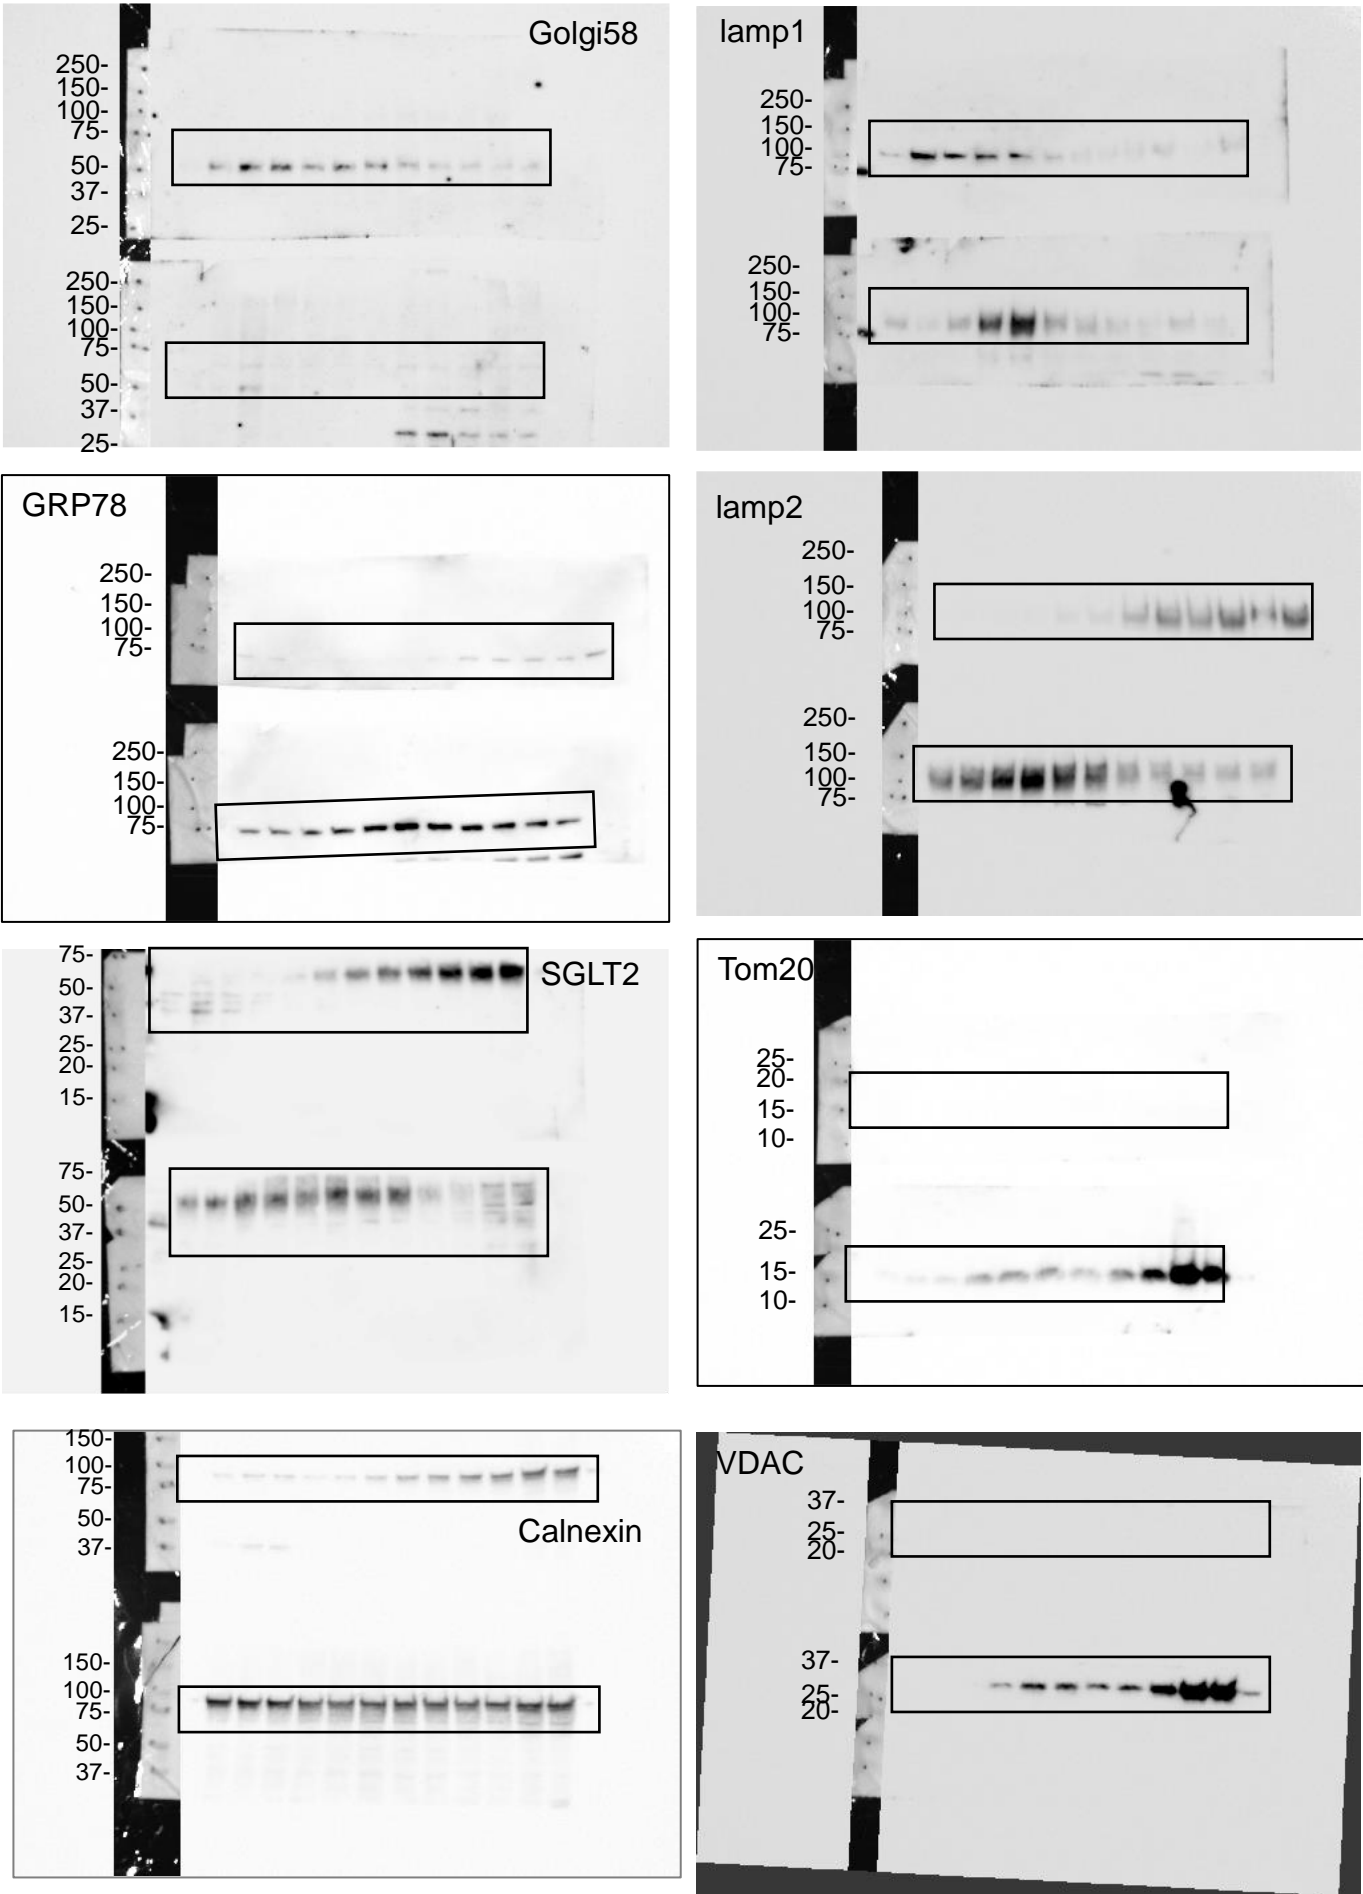

Uncropped images in Figure 2, continued

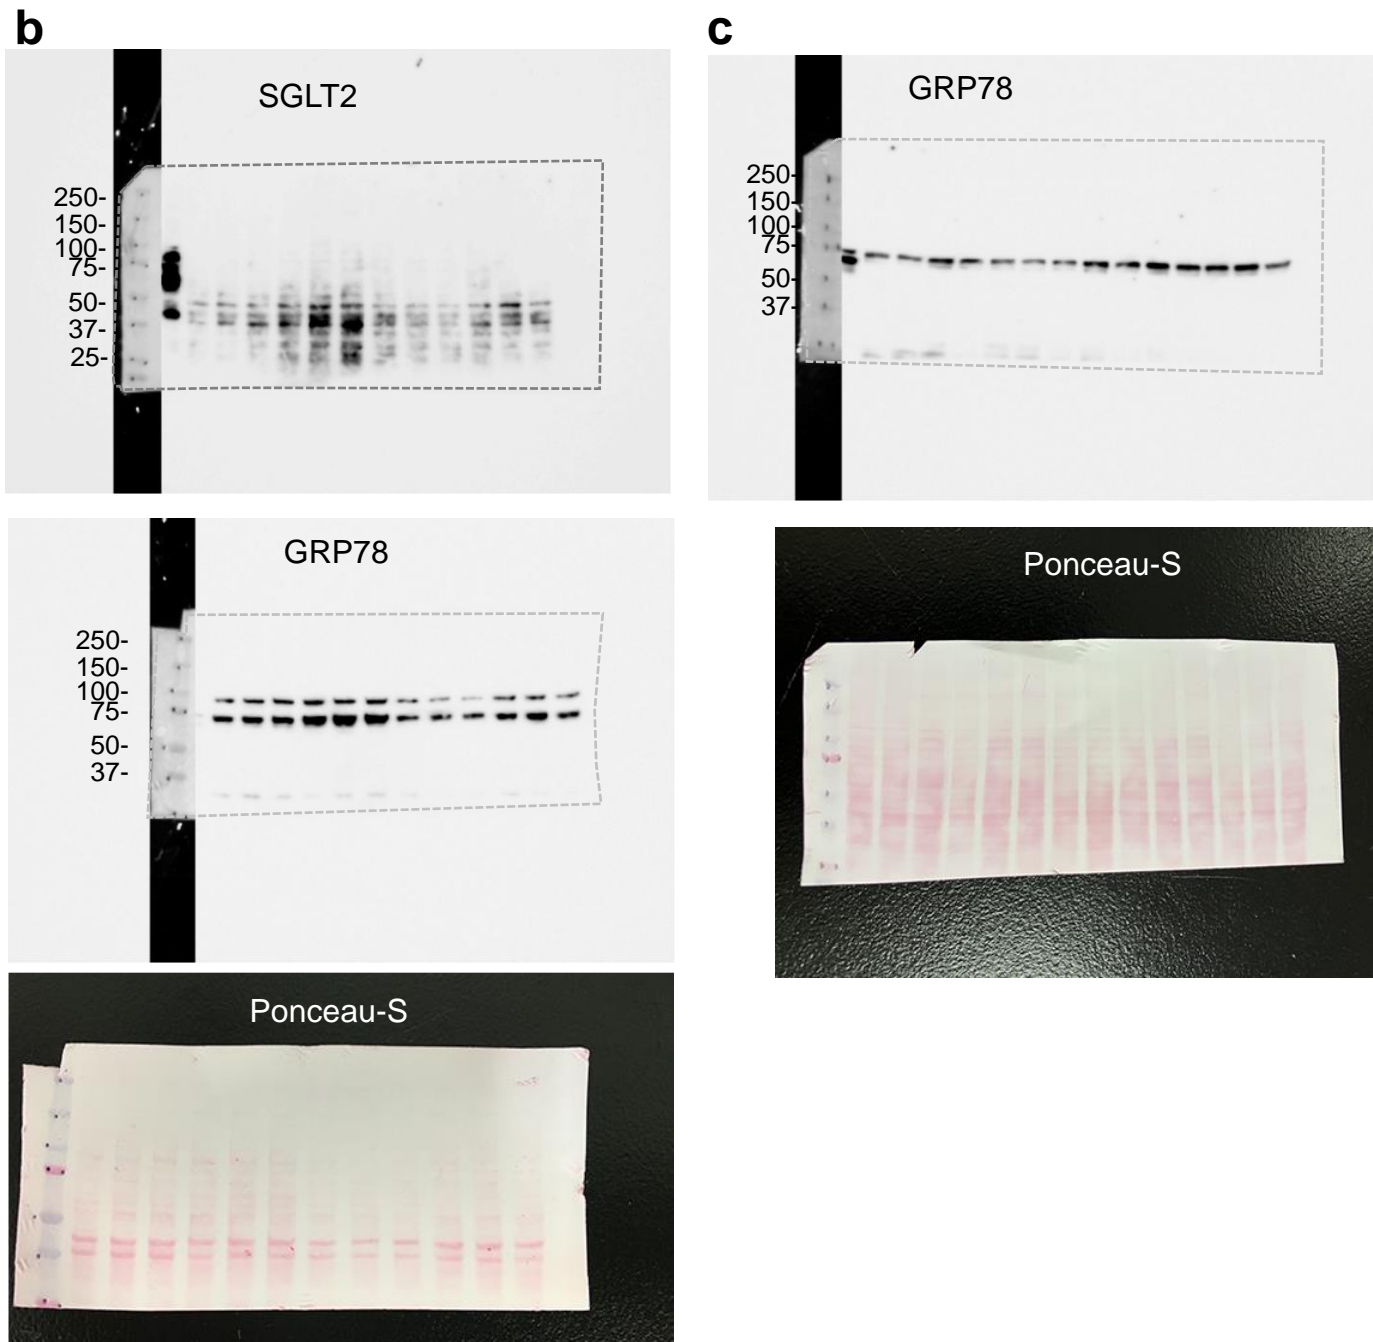

Uncropped images in Figure 3

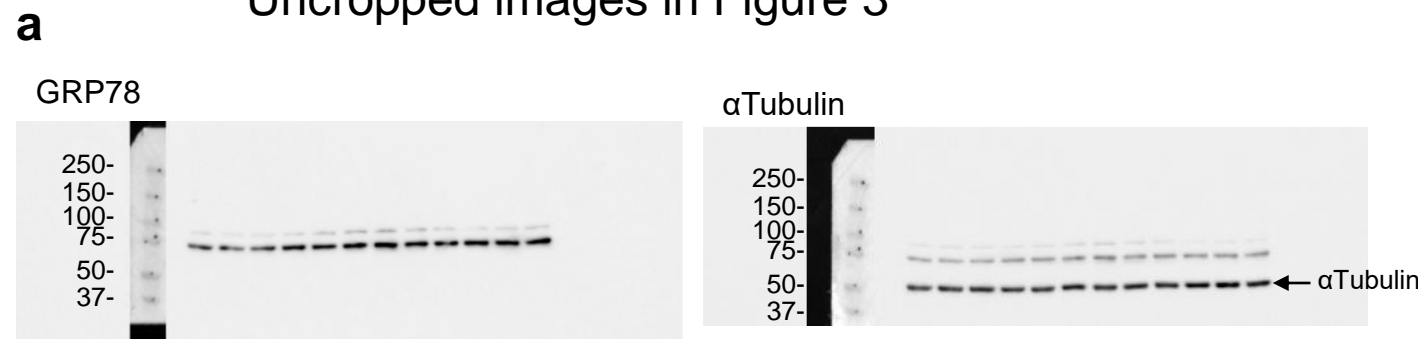

Uncropped images in Figure 4

a

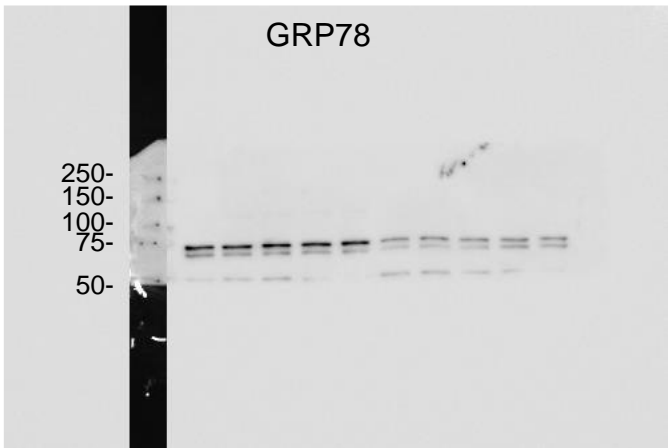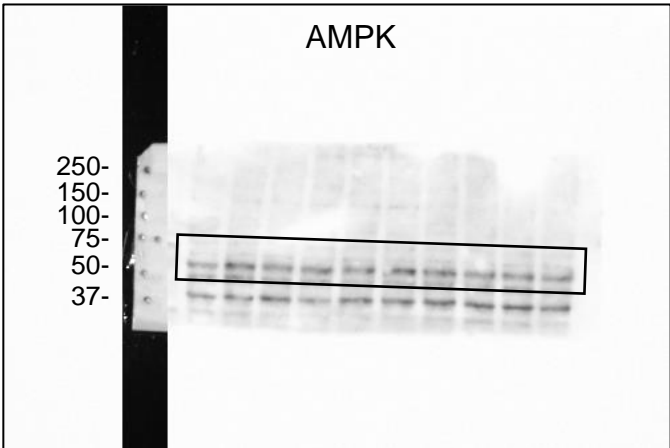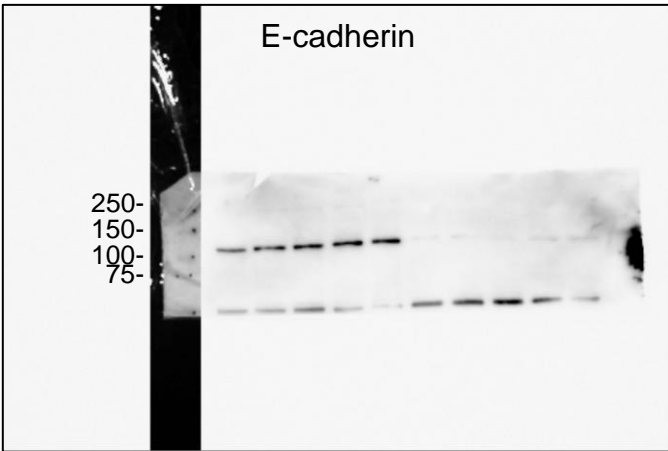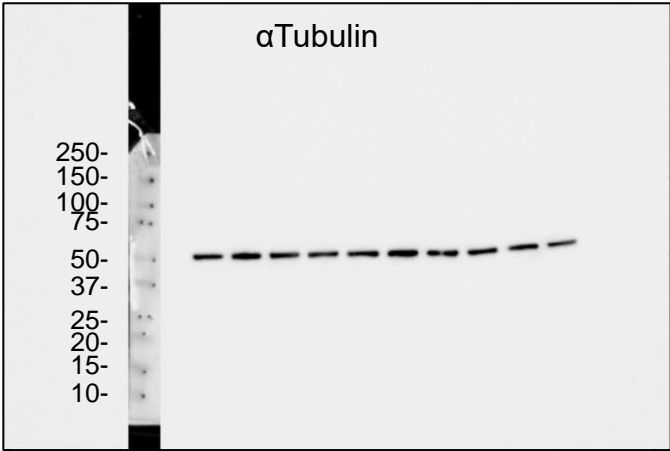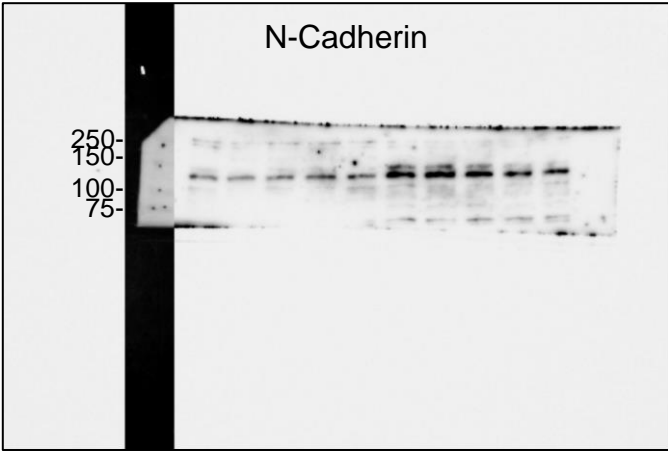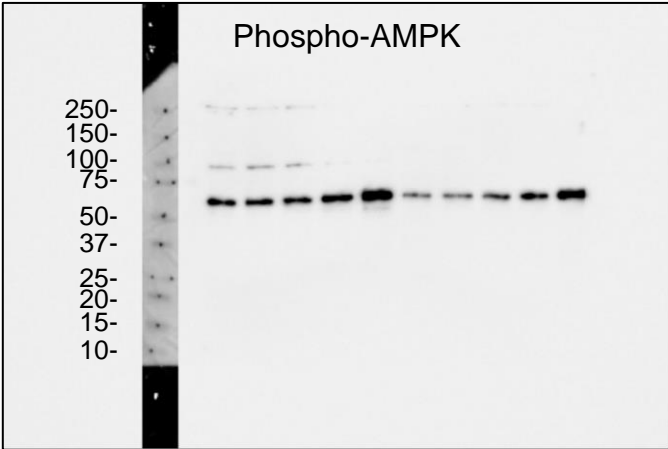



Uncropped images in Figure 4

**b**

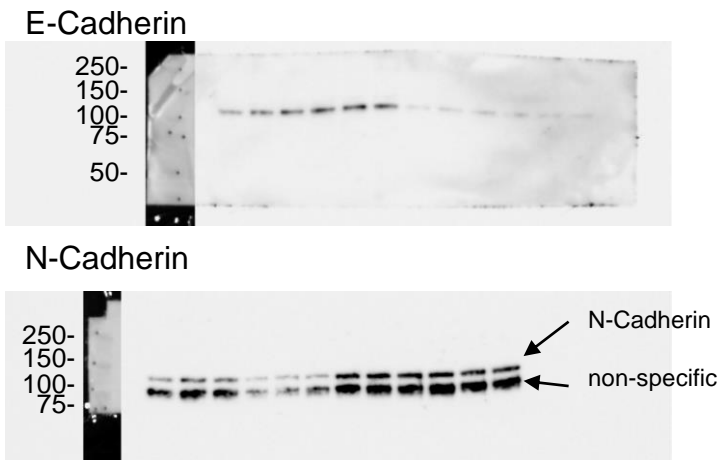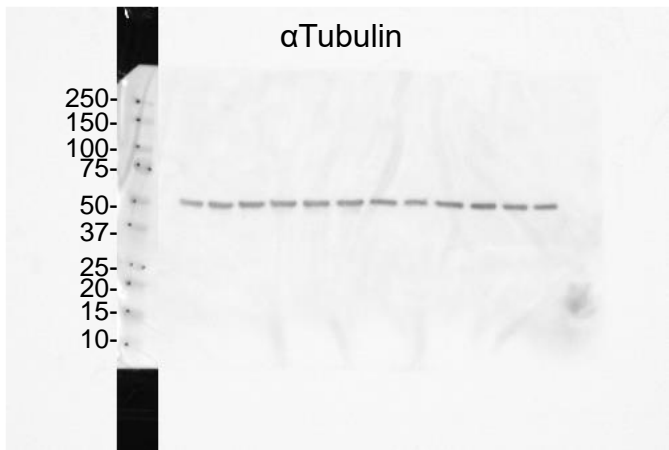

**c**

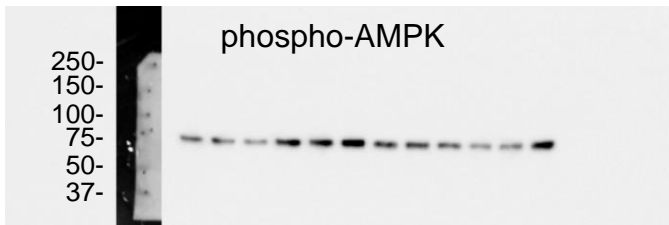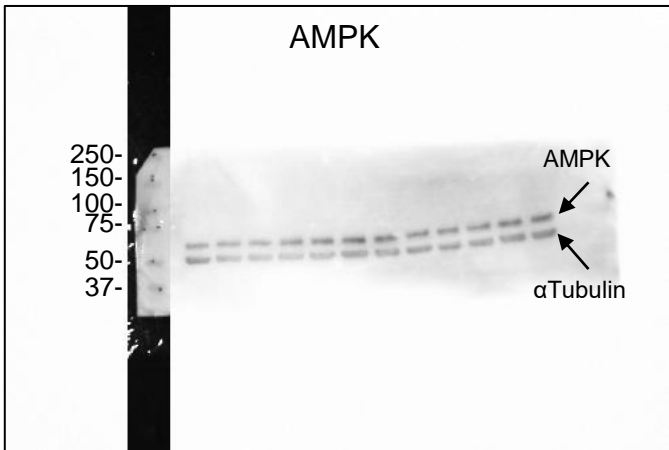

Uncropped images in Figure 6

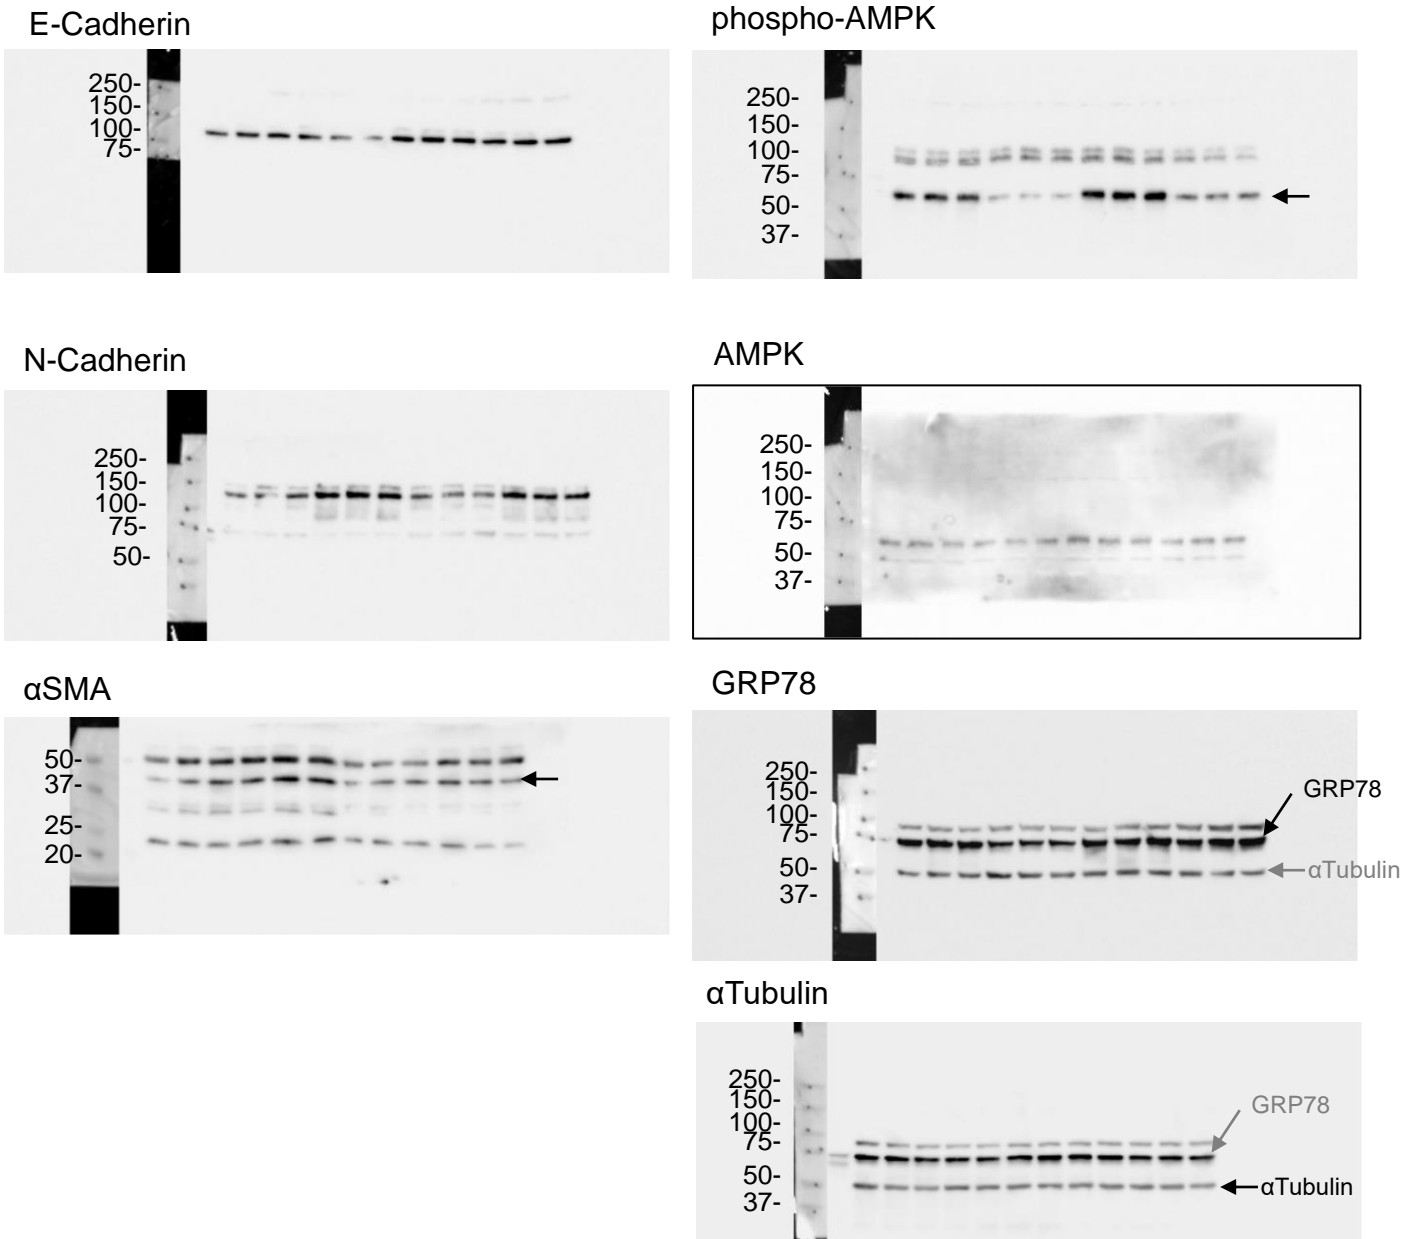

Uncropped images in Figure 7

**c**

phospho-p65NFkB

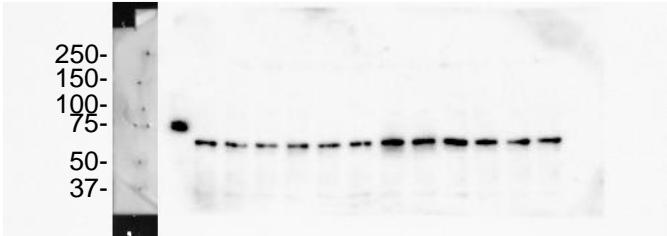

p65NFkB

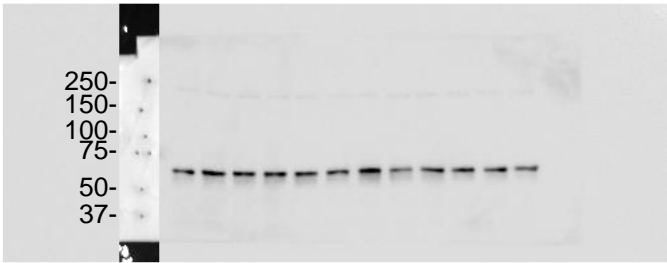

phospho-AMPK

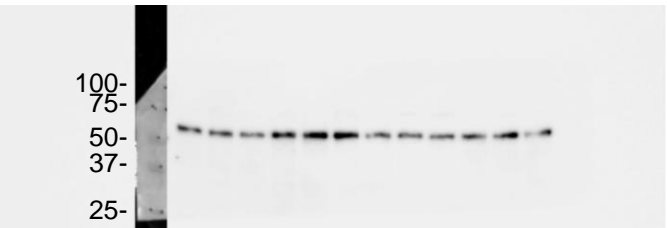

AMPK

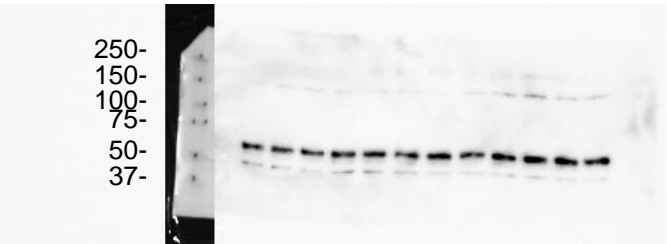

phospho-Akt

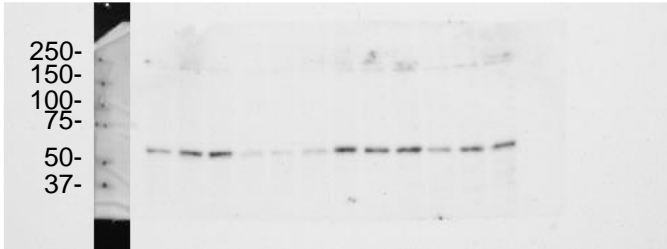

Akt

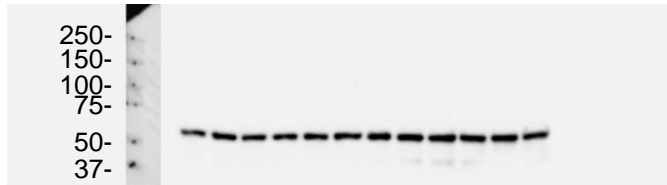

Uncropped images in Figure 8

**a**

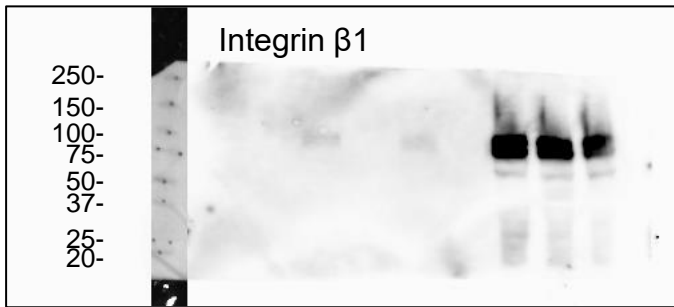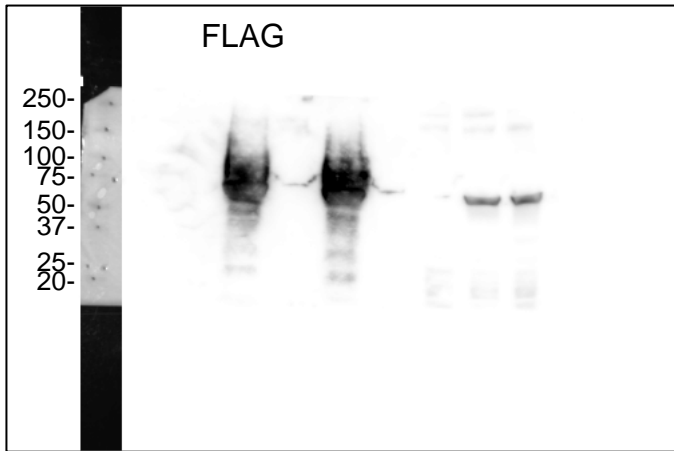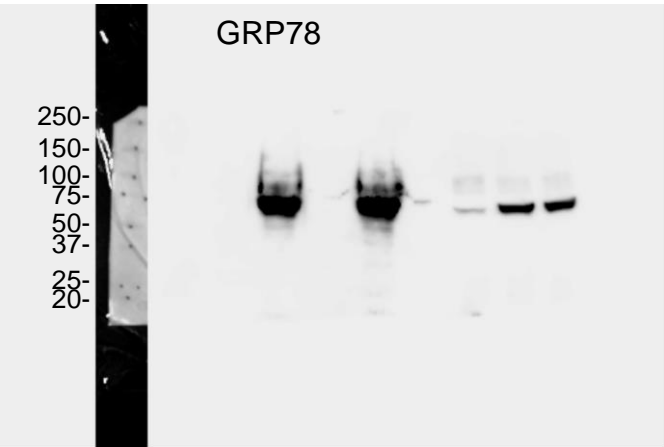

**b**

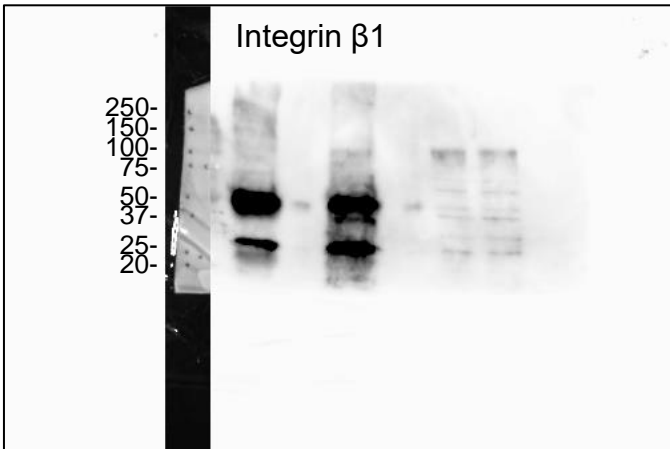

**c**

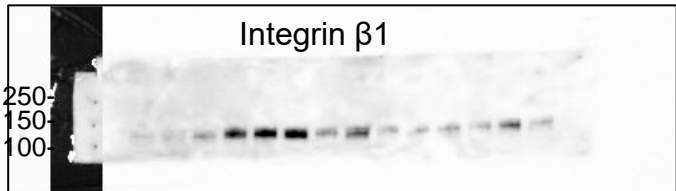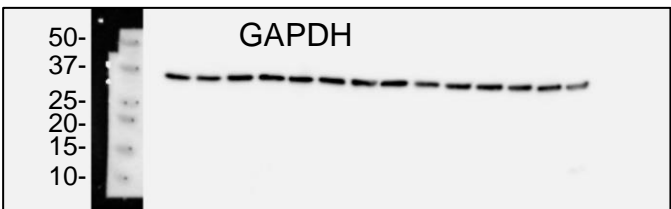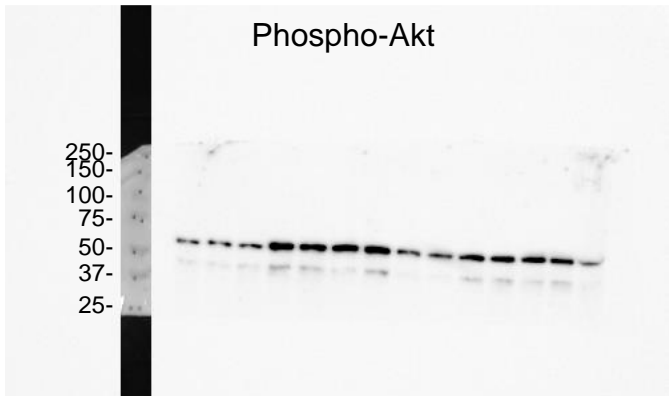

**b**

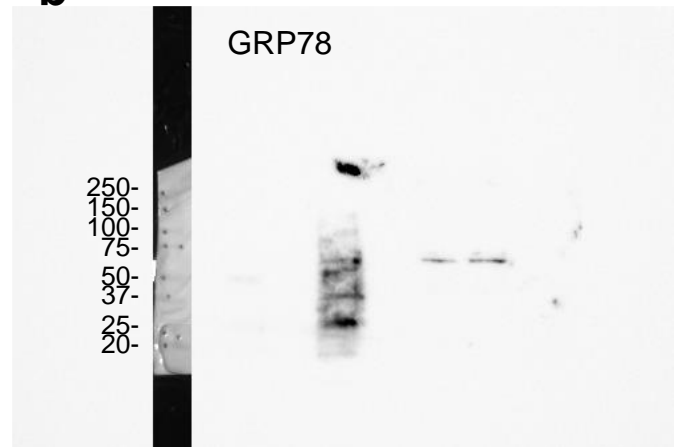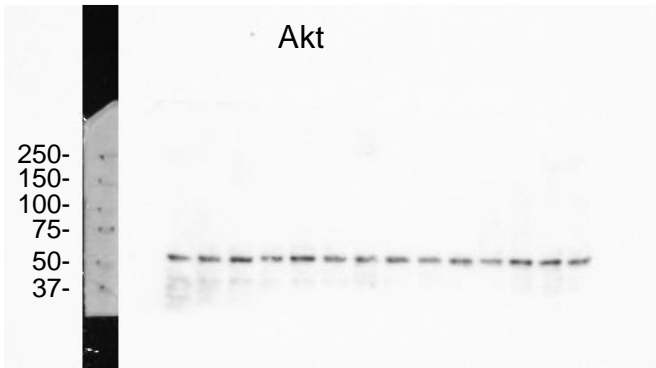

Uncropped images in Figure 8

**f**

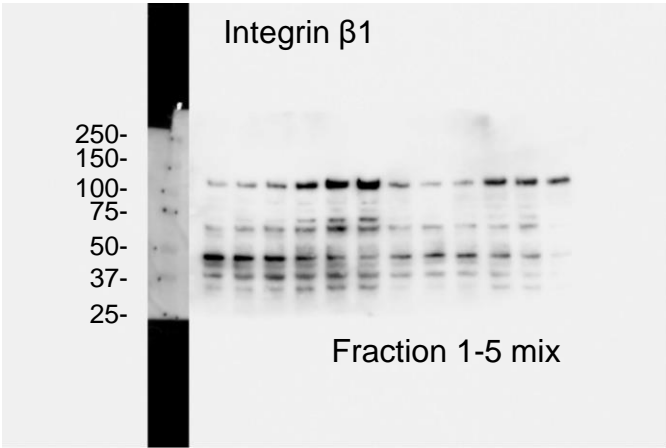



Uncropped images in Supplementary Fig. 1

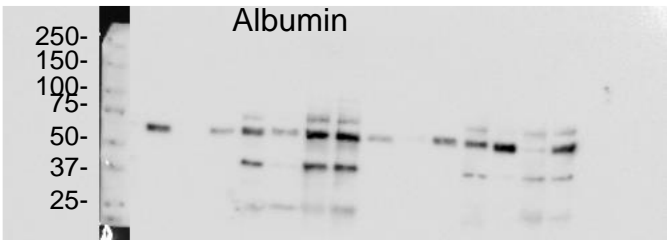

Uncropped images in Supplementary Fig. 2

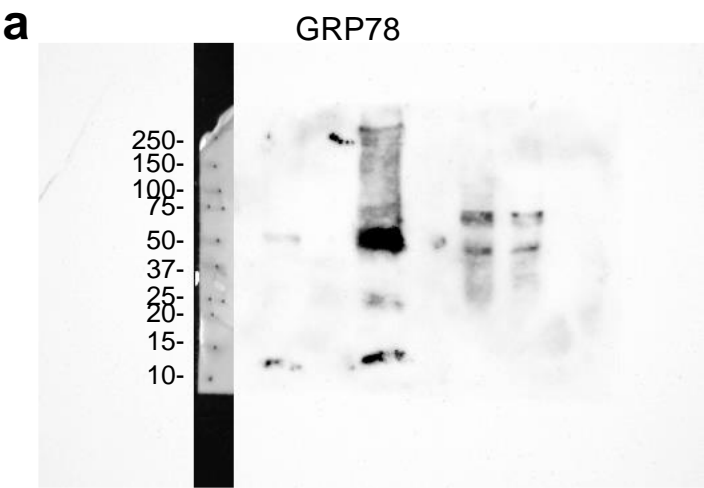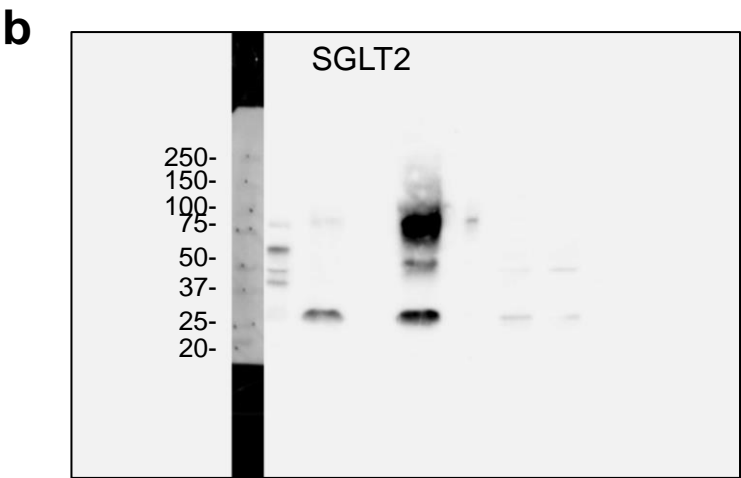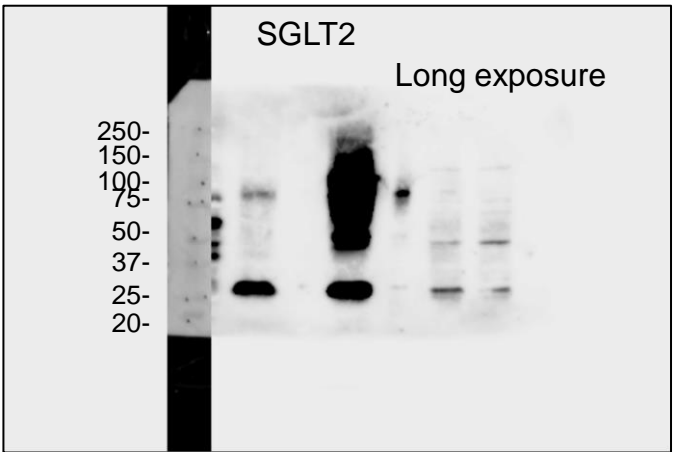

Uncropped images in Supplementary Fig.4

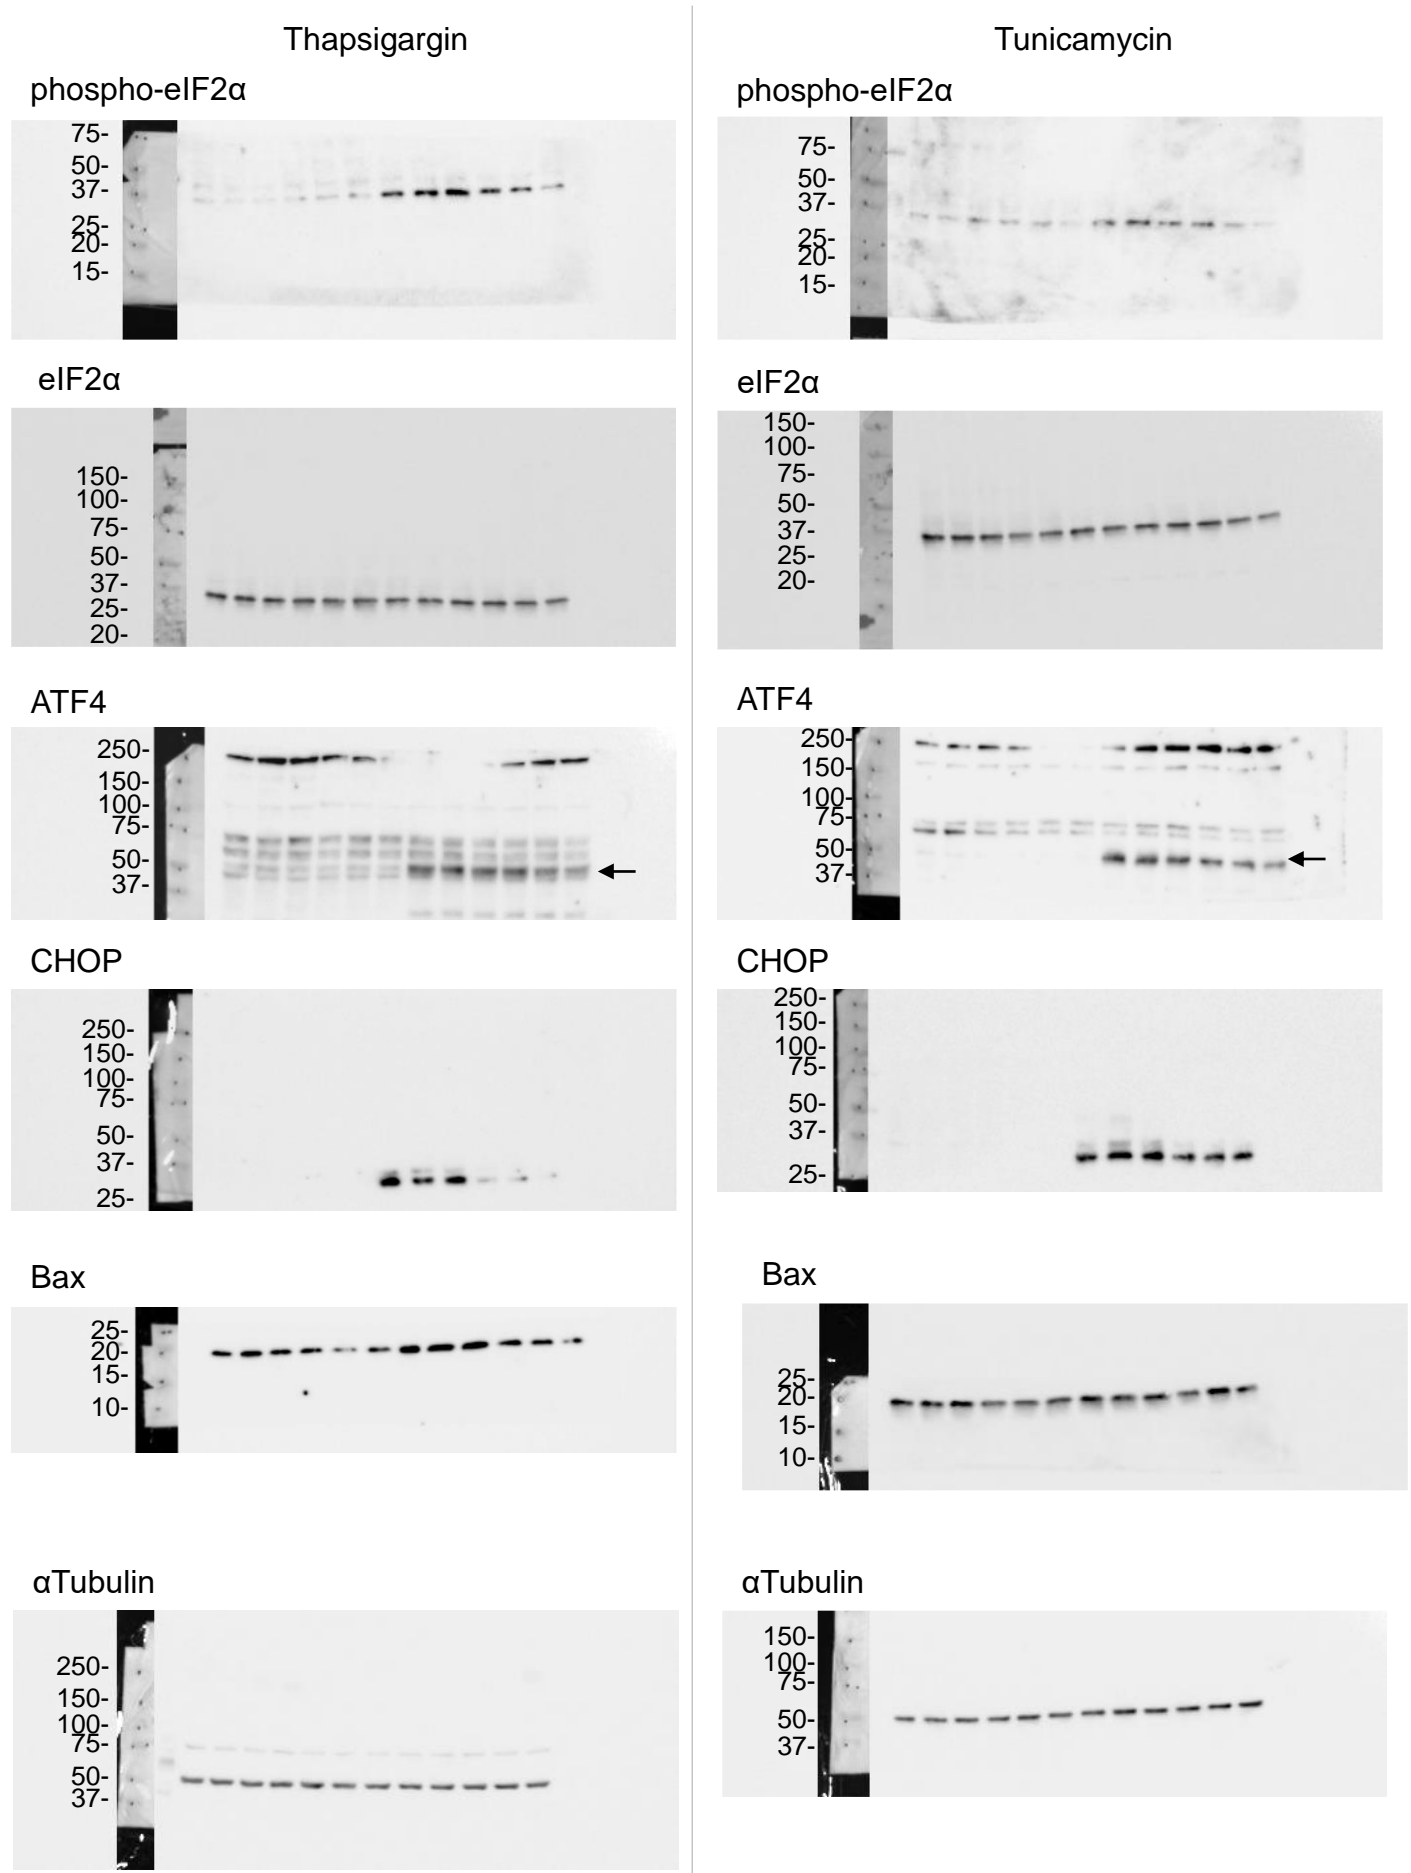

Uncropped images in Supplementary Fig.4, continued

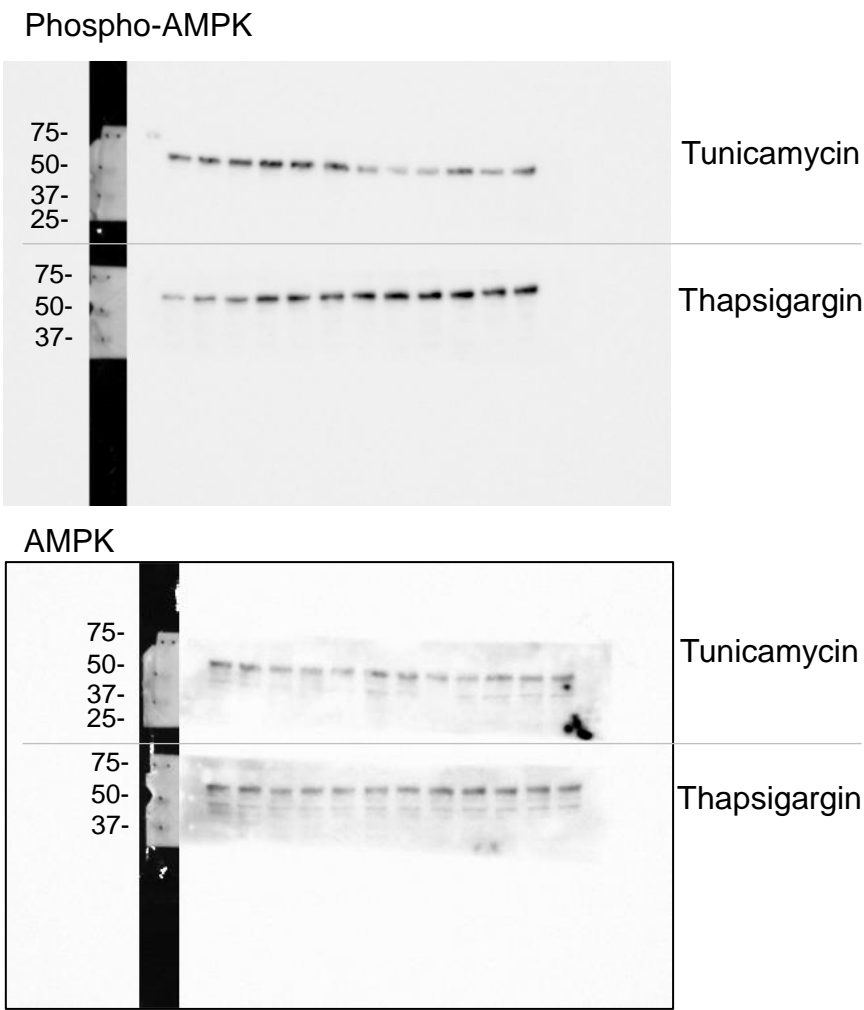

Uncropped images in Supplementary Fig.5

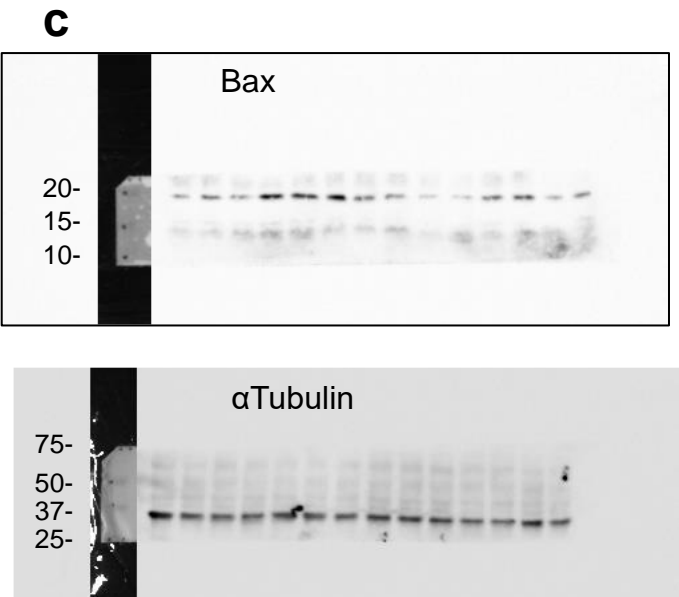

Uncropped images in Supplementary Fig.7

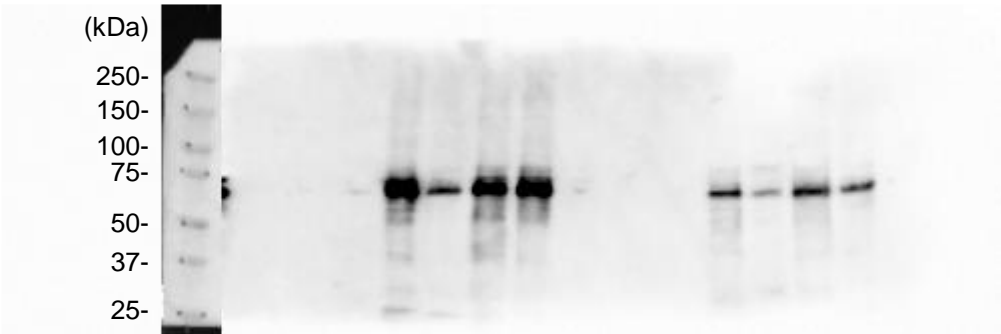

Uncropped images in Supplementary Fig.10

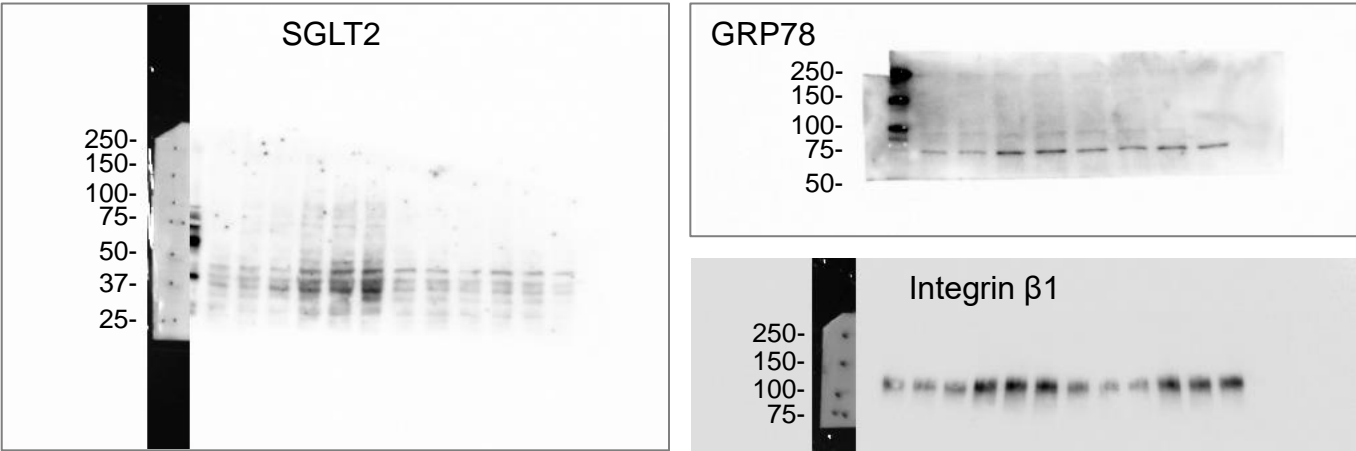

Supplement: Supplementary file 2 [file 1]
