# Supplementary material
Source: publisher figshare collection journal article supplement (https://diabetesjournals.figshare.com/articles/dataset/_/25259617)
Supplement: Supplementary file 1 [file 1]

# **Supplementary Information**

## **GRP78 contributes to the beneficial effects of SGLT2 inhibitor on proximal tubular cells in DKD**

Atsuko Nakatsuka<sup>1,2</sup>, Satoshi Yamaguchi<sup>2</sup>, and Jun Wada<sup>2</sup>

1 Division of Kidney, Diabetes and Endocrine Diseases, Okayama University Hospital

2 Department of Nephrology, Rheumatology, Endocrinology and Metabolism, Faculty of  
Medicine, Dentistry and Pharmaceutical Sciences, Okayama University

**Supplementary Table 1**

| <b>Primary antibody for western blotting</b>         | <b>catalog No.<br/>RRID</b> | <b>company</b>              | <b>dilution</b> | <b>KO/KD<br/>validated</b> |
|------------------------------------------------------|-----------------------------|-----------------------------|-----------------|----------------------------|
| <b>Albumin Rabbit Polyclonal antibody</b>            | 16475-1-AP<br>AB_2168001    | Proteintech                 | 1:5000          | no                         |
| <b>GRP78/BIP Polyclonal antibody</b>                 | 11587-1-AP<br>AB_2119855    | Proteintech                 | 1:1000          | Yes                        |
| <b>Anti-GRP78 BiP antibody [EPR4040(2)]</b>          | ab108613<br>AB_10859806     | abcam                       | 1:1000          | no                         |
| <b>rat monoclonal anti-GRP78 (76-E6)</b>             | sc-13539<br>AB_627698       | Santa Cruz<br>Biotechnology | 1:200           | no                         |
| <b>anti-Calnexin antibody</b>                        | C4731<br>AB_476845          | SIGMA                       | 1:2000          | no                         |
| <b>SGLT1 antibody [N3C3]</b>                         | GTX105367<br>AB_10624670    | Gene Tex                    | 1:1000          | no                         |
| <b>SGLT2 Rabbit Polyclonal antibody</b>              | 24654-1-AP<br>AB_2750601    | Proteintech                 | 1:1000          | Yes                        |
| <b>Monoclonal Anti-Golgi 58K Protein</b>             | G2404<br>AB_477002          | SIGMA                       | 1:1000          | no                         |
| <b>anti-LAMP1 antibody (rabbit polyclonal)</b>       | ab24170<br>AB_775978        | abcam                       | 1:1000          | no                         |
| <b>anti-LAMP2 antibody (H4B4) (mouse monoclonal)</b> | ab25631<br>AB_470709        | abcam                       | 1:500           | no                         |
| <b>Tom20 (D8T4N) Rabbit mAb</b>                      | #42406<br>AB_2687663        | CST                         | 1:2000          | no                         |
| <b>VDAC1 (D73D12) Rabbit mAb</b>                     | #4661<br>AB_10557420        | CST                         | 1:1000          | no                         |
| <b>anti-GAPDH (14C10)</b>                            | #2118<br>AB_561053          | CST                         | 1:5000          | no                         |
| <b>anti-<math>\alpha</math>Tubulin (DM1A)</b>        | #3873<br>AB_1904178         | CST                         | 1:5000          | no                         |
| <b>E-Cadherin (24E10) Rabbit mAb</b>                 | #3195<br>AB_2291471         | CST                         | 1:1000          | no                         |
| <b>E-cadherin Rabbit Polyclonal antibody</b>         | 20874-1-AP                  | Proteintech                 | 1:5000          | Yes                        |

|                                                                     |                          |             |         |          |
|---------------------------------------------------------------------|--------------------------|-------------|---------|----------|
|                                                                     | AB_10697811              |             |         |          |
| <b>N-cadherin Rabbit Polyclonal antibody</b>                        | 22018-1-AP<br>AB_2813891 | Proteintech | 1:2000  | Yes      |
| <b>Phospho-AMPK<math>\alpha</math> (Thr172)(40H9) Rabbit mAb</b>    | #2535<br>AB_331250       | CST         | 1:1000  | no       |
| <b>AMPK<math>\alpha</math> Antibody</b>                             | #2532<br>AB_330331       | CST         | 1:1000  | Yes (KD) |
| <b>Phospho-eIF2<math>\alpha</math> (Ser51) (D9G8) XP Rabbit mAb</b> | #3398<br>AB_2096481      | CST         | 1:1000  | no       |
| <b>rabbit polyclonal anti-eIF2<math>\alpha</math></b>               | #9722<br>AB_2230924      | CST         | 1:1000  | no       |
| <b>ATF4 (D4B8) Rabbit mAb</b>                                       | #11815<br>AB_2616025     | CST         | 1:1000  | no       |
| <b>CHOP (L63F7) Mouse mAb</b>                                       | #2895<br>AB_2089254      | CST         | 1:1000  | no       |
| <b>anti-Bax</b>                                                     | #2772<br>AB_10695870     | CST         | 1:1000  | Yes (KO) |
| <b>smooth muscle actin Polyclonal antibody</b>                      | 14395-1-AP<br>AB_2223009 | Proteintech | 1:1000  | Yes      |
| <b>Phospho-NF-<math>\kappa</math>Bp65(Ser536) (93H1) Rabbit mAb</b> | #3033<br>AB_331284       | CST         | 1:10000 | no       |
| <b>NF-<math>\kappa</math>Bp65 (D14E12) XP Rabbit mAb</b>            | #8242<br>AB_10859369     | CST         | 1:1000  | Yes (KO) |
| <b>Phospho-Akt (Ser473) (D9E) XP Rabbit mAb</b>                     | #4060<br>AB_2315049      | CST         | 1:1000  | no       |
| <b>Akt Antibody</b>                                                 | #9272<br>AB_329827       | CST         | 1:1000  | Yes (KD) |
| <b>Integrin beta 1/CD29 antibody</b>                                | GTX128839<br>AB_2885823  | Gene Tex    | 1:5000  | Yes      |
| <b>mouse monoclonal anti-FLAG M2</b>                                | F1804<br>AB_262044       | SIGMA       | 1:1000  |          |

Knockout (KO) and Knockdown (KD) Validation data are obtained from updated antibody specification datasheets and manufacturers' websites or technical support information.

**Supplementary Table 2**

| Primary antibody                                            | catalog No.<br>RRID       | company              | dilution | KO/KD<br>validated |
|-------------------------------------------------------------|---------------------------|----------------------|----------|--------------------|
| <b>Immunofluorescence</b>                                   |                           |                      |          |                    |
| <b>BIP (C50B12) Rabbit mAb (Alexa Fluor 647 Conjugated)</b> | #57163                    | CST                  | 1:75     | no                 |
| <b>Immunohistochemistry</b>                                 |                           |                      |          |                    |
| <b>BiP (C50B12) Rabbit mAb</b>                              | #3177<br>AB_2119845       | CST                  | 1:200    | no                 |
| <b>anti-Fibronectin antibody</b>                            | ab2413<br>AB_2262874      | abcam                | 1:500    | no                 |
| <b>TIM-1/KIM-1/HAVCR Antibody</b>                           | NBP1-76701<br>AB_11037459 | Novus<br>Biologicals | 1:100    | Yes                |
| <b>Integrin beta 1/CD29 antibody</b>                        | GTX128839<br>AB_2885823   | Gene Tex             | 1:1000   | Yes                |

Knockout (KO) and Knockdown (KD) Validation data are obtained from updated antibody specification datasheets and manufacturers' websites.

### **Supplemental Figure 1. Metabolic and urinary data of mice.**

**a.** body weight (g); **b.** blood glucose (mg/dL); **c.** kidney weight (g) / body weight (g) ratio; **d.** urine volume (mL/day); **e.** food intake (g/day); **f.** serum creatinine (Cr) (mg/dL); **g.** creatinine clearance (Ccr) (ml/min/kg). N=6-13. CTRL; Citrate buffer administrated control mouse, STZ; streptozotocin (STZ) -induced diabetic mouse, CTRL+CANA; Canagliflozin administrated control mouse, STZ+CANA; Canagliflozin administrated STZ-induced diabetic mouse. One-way ANOVA followed by Tukey-Kramer test is used. All Data are presented as mean  $\pm$  S.D., \*\*p<0.01, \*\*\*\*p<0.0001. **h and i.** Western blot for albumin using urine samples (**f**). Analysis was performed with loading doses of each sample proportional to the 24-hour urine volume to simulate daily albumin excretion. Densitometry quantification of Western blot (**g**). N=5-8. One-way ANOVA followed by Tukey-Kramer test is used. All Data are presented as mean  $\pm$  S.D., \*p<0.05,

### **Supplementary Figure 2. GRP78 as a SGLT2-inteactive molecule.**

**a.** Kidney lysate of STZ-induced diabetic mouse were immunoprecipitated with IgG or SGLT2 antibody. Blot with GRP78. **b.** Kidney lysate of STZ-induced diabetic mouse were immunoprecipitated with IgG or GRP78 antibody. Blot with SGLT2 antibody. The exposure time to detect SGLT2 band was different between immunoprecipitated and input protein. Two membranes with different exposure times are presented side by side for the band of SGLT2 with input samples.

### **Supplementary Figure 3. Immunofluorescence staining of mouse kidney and electron microscopy of mouse proximal tubular cells.**

**a.** Double immunofluorescence staining of mouse kidney for GRP78; green signal and ER

marker Calnexin; red signal. CTRL; Citrate buffer administrated control mouse, STZ; streptozotocin (STZ) -induced diabetic mouse, CTRL+CANA; Canagliflozin administrated control mouse, STZ+CANA; Canagliflozin administrated STZ-induced diabetic mouse. Bar=50  $\mu$ m. Statistical analysis of the merged area in tubular cell of 4-5 different mice per group is shown in the right column. \* $p$ <0.05, \*\*\* $p$ <0.001. **b.** Electron microscopy of mouse proximal tubular cells. Asterisk; ER. Bar=1  $\mu$ m.

**Supplementary Figure 4. Canagliflozin suppresses ER stress enhancement induced by SERCA inhibitor, thapsigargin, in HK2 cells.**

**a.** Western blot analysis of HK2 cells. The expression of both SGLT1 and SGLT2 were confirmed. HK2 cells were cultured with DMSO or 1  $\mu$ M thapsigargin (TG) or 1  $\mu$ g/ml tunicamycin (TM) for 24 hr. Canagliflozin was co-administrated at 0  $\mu$ M or 3  $\mu$ M for 24 hr. **b.** Western blot analyses. **c.** Densitometry quantification of Western blot. N=3, One-way ANOVA followed by Tukey-Kramer test is used. All Data are presented as mean  $\pm$  S.D., \* $p$ <0.05, \*\* $p$ <0.01, \*\*\* $p$ <0.001, \*\*\*\* $p$ <0.0001.

**Supplementary Figure 5. Canagliflozin (CANA) inhibits cell damages of tubular cells in STZ-induced diabetic mice.**

**a.** TUNEL assay. The number of TUNEL positive cells per slice were counted across multiple fields per mouse and counts from different 4-5 mice were used for statistics. Statistical analysis was shown in the right column. N=4-5. Bar=100  $\mu$ m. **b.** Immunohistochemical staining for KIM-1. KIM-1 positive regions were averaged across multiple fields per mouse and values from different 6-9 mice were used for statistics. Statistical analysis was performed on different mice as shown in the right column. N=6-9. Bar=100  $\mu$ m. **c.** Western blotting using

kidney tissues. Densitometry quantification of Western blot is shown in the right column. N=3. CTRL; Citrate buffer administrated control mouse, STZ; streptozotocin (STZ) -induced diabetic mouse, CTRL+CANA; Canagliflozin administrated control mouse, STZ+CANA; Canagliflozin administrated STZ-induced diabetic mouse. All data are presented as mean  $\pm$  S.D. One-way ANOVA followed by Tukey-Kramer test is used. \* $p < 0.05$ , \*\* $p < 0.01$ , \*\*\* $p < 0.001$ , \*\*\*\* $p < 0.0001$ .

**Supplementary Figure 6. Canagliflozin (CANA) inhibits fibrosis of STZ induced diabetic kidney.**

Immunohistochemical staining of fibronectin. Bar=100  $\mu\text{m}$ . Fibronectin positive area was measured and statistically analyzed as shown in the right column.

CTRL; Citrate buffer administrated control mouse, STZ; streptozotocin (STZ) -induced diabetic mouse, CTRL+CANA; Canagliflozin administrated control mouse, STZ+CANA; Canagliflozin administrated STZ-induced diabetic mouse. N=5-10. One-way ANOVA followed by Tukey-Kramer test is used. All Data are presented as mean  $\pm$  S.D. \* $p < 0.05$ , \*\* $p < 0.01$ .

**Supplementary Figure 7. Urinary secretion of GRP78 in mice.**

- a. Western blot for GRP78 using urine samples. Analysis was performed with loading doses of each sample proportional to the 24-hour urine volume to simulate daily GRP78 excretion.
- b. Densitometry quantification of Western blot (**g**). N=4. P values were determined by unpaired *t* test, \* $p < 0.05$ .

**Supplemental Figure 8. Canagliflozin (CANA) promotes endoplasmic reticulum (ER) robustness.**

In diabetic kidney disease, ER stress is enhanced and regulated by unfolded protein responses (UPR). Excessive and prolonged ER stress leads to UPR failure and cell death. Knockdown of GRP78, which is major player of UPR, also promotes UPR failure. CANA plays a cytoprotective role in reducing excessive ER stress and promoting ER robustness.

#### **Supplemental Figure 9. Graphical abstract.**

Canagliflozin protects proximal tubular cells and inhibits EMT and interstitial fibrosis via following mechanisms. (1) Canagliflozin protects proximal tubular cells by enhancing AMPK phosphorylation, improving ER robustness, and suppressing EMT coordinating with GRP78.

(2) Canagliflozin suppress the secretion of soluble secreted GRP78 (sGRP78) from tubular cells and inhibit sGRP78-induced phosphorylation of p65NFkB and Akt in surrounding tubules. (3)

Canagliflozin contributed to the maintenance of the appropriate amount and localization of integrins  $\beta 1$  in tubular cells.

#### **Supplemental Figure 10.**

Reproducibility experiment of Figure 2b and Figure 8f using another mouse kidney.

#### **Supplemental Figure 11. Uncropped images**
